# Supplementary material
Source: publisher figshare collection journal article supplement (https://acs.figshare.com/ndownloader/files/4722244)
Supplement: Supplementary file 1 [file 4722244]

*Supporting Information to Accompany*

# Practical Synthesis of $\alpha$ -Aryl methyl ketones via a Transition-Metal free Meerwein Arylation

*Carmela Molinaro,<sup>\*,†</sup> Jeffrey Mowat,<sup>†</sup> Francis Gosselin,<sup>†</sup> Paul D. O'Shea,<sup>†</sup> Jean-François Marcoux,<sup>‡</sup> Rémy Angelaud<sup>‡</sup> and Ian W. Davies<sup>‡</sup>*

<sup>†</sup> Department of Process Research, Merck Frosst Centre for Therapeutic Research, 16711 Autoroute Transcanadienne, Kirkland, Québec, Canada, H9H 3L1. <sup>‡</sup> Department of Process Research, Merck Research Laboratories, P.O. Box 2000, Rahway, NJ 07065, USA.

carmela\_molinaro@merck.com

## Table of contents

|                                                                            |        |
|----------------------------------------------------------------------------|--------|
| General information .....                                                  | S2     |
| General procedure for the synthesis of $\alpha$ -aryl methyl ketones ..... | S2     |
| Characterization data of compounds.....                                    | S2-S4  |
| Copies of <sup>1</sup> H NMR and <sup>13</sup> C NMR.....                  | S5-S20 |

**General Information.** Unless otherwise noted, all reactions were performed under an oxygen-free atmosphere of nitrogen. All commercially available reagents were used without further purification. The diazonium tetrafluoroborate salts were either commercially available or prepared according to literature.<sup>1</sup> Liquid chromatography was performed using a forced flow (flash chromatography) of the indicated solvent system on silica gel (230-400 mesh).<sup>2</sup> <sup>1</sup>H and <sup>13</sup>C NMR spectra were recorded in deuteriochloroform (CDCl<sub>3</sub>), unless otherwise noted, on a 400 or 500 MHz instrument. Chemical shifts of <sup>1</sup>H NMR spectra are reported in parts per million (ppm) on the  $\delta$  scale from an internal standard of residual chloroform (7.27 ppm). Data are reported as follows: chemical shift, integration, multiplicity (s = singlet, d = doublet, t = triplet, q = quartet, m = multiplet and br = broad) and coupling constant in hertz (Hz). Chemical shifts of <sup>13</sup>C NMR spectra are reported in ppm from the central peak of CDCl<sub>3</sub> (77 ppm) on the  $\delta$  scale. High Resolution mass spectra (HMRS) were performed on a high resolution magnetic sector mass spectrometer.

### General procedure

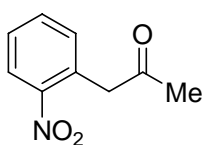

**2-nitrophenylacetone<sup>3</sup> (2b):** To a stirred solution of isopropenyl acetate (4.4 mL, 40 mmol) in acetone (13 mL) and water (7 mL) was added 0.1 mL of a solution of KOAc (200 mg, 2 mmol) in water (1 mL) followed by 2-nitrobenzenediazonium tetrafluoroborate (474 mg, 2 mmol). Then, the rest of the aqueous KOAc solution was added dropwise over 2 hours and stirred overnight. The reaction mixture was diluted with MTBE and water and the layers were separated. The aqueous layer was back-extracted with MTBE. The combined organic extracts were washed with aqueous saturated NaHCO<sub>3</sub> and brine and dried over MgSO<sub>4</sub>. The solvent was removed under reduced pressure and the crude mixture purified by column chromatography on silica gel with Hexane:EtOAc (3:1) to provide 244 mg (76%) of **2b**.<sup>1</sup> <sup>1</sup>H NMR (400 MHz, CDCl<sub>3</sub>)  $\delta$  8.14 (1 H, d,  $J$  = 8.0 Hz), 7.61 (1 H, t,  $J$  = 7.0 Hz), 7.48 (1 H, t,  $J$  = 7.3 Hz), 7.30 (1 H, d,  $J$  = 7.6 Hz), 4.14 (s, 2 H), 2.34 (s, 3 H).

<sup>1</sup> Doyle, M. P.; Bryker, W. J. *J. Org. Chem.* **1979**, *44*, 1572.

<sup>2</sup> Still, W. C.; Kahn, M.; Mitra, A. *J. Org. Chem.* **1978**, *43*, 2923.

<sup>3</sup> Strazzolini, P.; Giumanini, A. G.; Runcio, A.; Scuccato, M. *J. Org. Chem.* **1998**, *63*, 952.

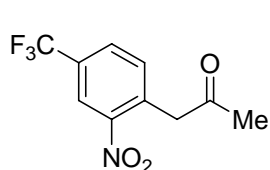

**2-Nitro-4-trifluoromethylphenylacetone<sup>4</sup> (2c):** The general procedure was followed. Isolated 286 mg (65%). <sup>1</sup>H NMR (400 MHz, CDCl<sub>3</sub>) δ 8.38 (1 H, s), 7.85 (1 H, d, *J* = 7.6 Hz), 7.46 (1 H, d, *J* = 7.8 Hz), 4.25 (2 H, s), 2.36 (3 H, s).

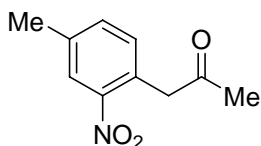

**2-Nitro-4-methylphenylacetone (2d):** The general procedure was followed. Isolated 205 mg (60%). <sup>1</sup>H NMR (400 MHz, CDCl<sub>3</sub>) δ 7.97 (1 H, s), 7.43 (1 H, d, *J* = 7.7 Hz), 7.18 (1 H, d, *J* = 7.7 Hz), 4.10 (2 H, s), 2.47 (3 H, s), 2.35 (3 H, s); <sup>13</sup>C NMR (100 MHz, CDCl<sub>3</sub>) δ 203.9, 148.4, 138.9, 134.4, 133.3, 127.4, 125.6, 48.2, 29.9, 20.82; HRMS ESI (*m/z*): [*M* + H]<sup>+</sup> calcd for C<sub>10</sub>H<sub>12</sub>O<sub>3</sub>N, 194.0810; found 194.0811.

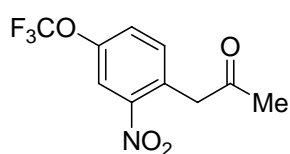

**2-Nitro-4-trifluoromethoxyphenylacetone<sup>5</sup> (2e):** The general procedure was followed. Isolated 162 mg (34%). <sup>1</sup>H NMR (400 MHz, CDCl<sub>3</sub>) δ 8.04 (1 H, d, *J* = 9.6 Hz), 7.49 (1 H, d, *J* = 8.4 Hz), 7.35 (1 H, d, *J* = 8.4 Hz), 4.17 (2 H, s), 2.35 (3 H, s).

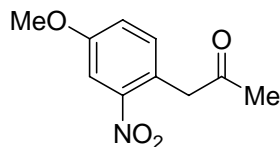

**2-Nitro-4-methoxyphenylacetone<sup>6</sup> (2f):** The general procedure was followed. Isolated 50 mg (13%). <sup>1</sup>H NMR (400 MHz, CDCl<sub>3</sub>) δ 7.67 (1 H, d, *J* = 2.4 Hz), 7.20-7.14 (2 H, m), 4.06 (2 H, s), 3.91 (3 H, s), 2.33 (3H, s).

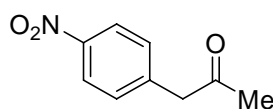

**4-Nitrophenylacetone<sup>7</sup> (2a):** The general procedure was followed. Isolated 188 mg (58%). <sup>1</sup>H NMR (400 MHz, CDCl<sub>3</sub>) δ 8.21 (2 H, d, *J* = 8.5 Hz), 7.38 (2 H, d, *J* = 8.5 Hz), 3.87 (2 H, s), 2.26 (3 H, s).

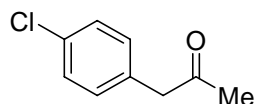

**4-Chlorophenylacetone<sup>8</sup> (2g):** The general procedure was followed. Isolated 212 mg (70%). <sup>1</sup>H NMR (400 MHz, CDCl<sub>3</sub>) δ

<sup>4</sup> Allais, A.; Meier, J.; Mathieu, J.; Nomine, G.; Peterfalvi, M.; Deraedt, R.; Chiffot, L.; Benzoni, J.; Fournex, R. *Eur. J. Med. Chem. Ther.* **1975**, *10*, 187.

<sup>5</sup> Wong, A.; Kuethe, J. T.; Davies, I. W. *J. Org. Chem.* **2003**, *68*, 9865.

<sup>6</sup> Cardwell, K.; Hewitt, B.; Ladlow, M.; Magnus, P. *J. Am. Chem. Soc.* **1988**, *110*, 2242.

<sup>7</sup> Rafizadeh, K.; Yates, K. *J. Org. Chem.* **1984**, *49*, 1500.

7.33 (2 H, d,  $J = 8.3$  Hz), 7.16 (2 H, d,  $J = 8.3$  Hz), 3.70 (2 H, s), 2.19 (3 H, s).

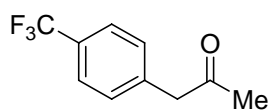

**4-Trifluoromethylphenylacetone**<sup>9</sup> (**2h**): The general procedure was followed. Isolated 257 mg (71%). <sup>1</sup>H NMR (400 MHz, CDCl<sub>3</sub>)  $\delta$  7.60 (2 H, d,  $J = 7.9$  Hz), 7.33 (2 H, d,  $J = 7.9$  Hz), 3.79 (2 H, s), 2.21 (3 H, s).

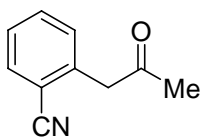

**2-Cyanophenylacetone**<sup>10</sup> (**2i**): The general procedure was followed. Isolated 207 mg (72%). <sup>1</sup>H NMR (400 MHz, CDCl<sub>3</sub>)  $\delta$  7.63 (1 H, d,  $J = 7.8$  Hz), 7.54 (1 H, t,  $J = 7.7$  Hz), 7.36 (1 H, t,  $J = 7.6$  Hz), 7.29 (1 H, d,  $J = 7.8$  Hz), 3.97 (2 H, s), 2.27 (3 H, s).

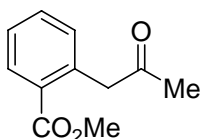

**Methyl 2-(2-oxopropyl)benzoate**<sup>11</sup> (**2j**): The general procedure was followed. Isolated 200 mg (58%). <sup>1</sup>H NMR (400 MHz, CDCl<sub>3</sub>)  $\delta$  8.04 (1 H, d,  $J = 7.8$  Hz), 7.49 (1 H, t,  $J = 7.5$  Hz), 7.36 (1 H, t,  $J = 7.6$  Hz), 7.20 (1 H, d,  $J = 7.6$  Hz), 4.11 (2 H, s), 3.86 (3 H, s), 2.28 (3 H, s).

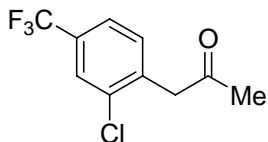

**2-Chloro-4-trifluoromethylphenylacetone** (**2k**): The general procedure was followed. Isolated 262 mg (62%). <sup>1</sup>H NMR (400 MHz, CDCl<sub>3</sub>)  $\delta$  7.66 (1 H, s), 7.49 (1 H, d,  $J = 8.0$  Hz), 7.32 (1 H, d,  $J = 10.4$  Hz), 3.93 (2 H, s), 2.26 (3 H, s); <sup>13</sup>C NMR (125 MHz, CDCl<sub>3</sub>)  $\delta$  203.6, 136.9, 135.0, 132.2, 131.1 (q,  $J = 33$  Hz), 126.5 (q,  $J = 3.8$  Hz), 123.8 (q,  $J = 3.6$  Hz), 122.2 (q,  $J = 272$  Hz), 48.0, 29.9; HRMS ESI ( $m/z$ ): [M + H]<sup>+</sup> calcd for C<sub>10</sub>H<sub>9</sub>OF<sub>3</sub>Cl, 237.0288; found 237.0286.

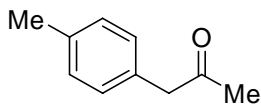

**4-Methylphenylacetone**<sup>7</sup> (**2l**): The general procedure was followed. Isolated 104 mg (39%). <sup>1</sup>H NMR (400 MHz, CDCl<sub>3</sub>)  $\delta$  7.19 (2 H, d,  $J = 8.0$  Hz), 7.14 (2 H, d,  $J = 8.0$  Hz), 3.69 (2 H, s), 2.38 (3 H, s), 2.18 (3 H, s).

<sup>8</sup> Kurz, M. E.; Baru, V.; Nguyen, P-N. *J. Org. Chem.* **1984**, *49*, 1603.

<sup>9</sup> Owen, J. R.; Saunders, W. H. Jr. *J. Am. Chem. Soc.* **1966**, *88*, 5809.

<sup>10</sup> Schubert, T.; Kula, M.-R.; Müller, M. *Synthesis* **1999**, 2045.

<sup>11</sup> Korte, D. E.; Hegedus, L. S.; Wirth, R. K. *J. Org. Chem.* **1977**, *42*, 1329.

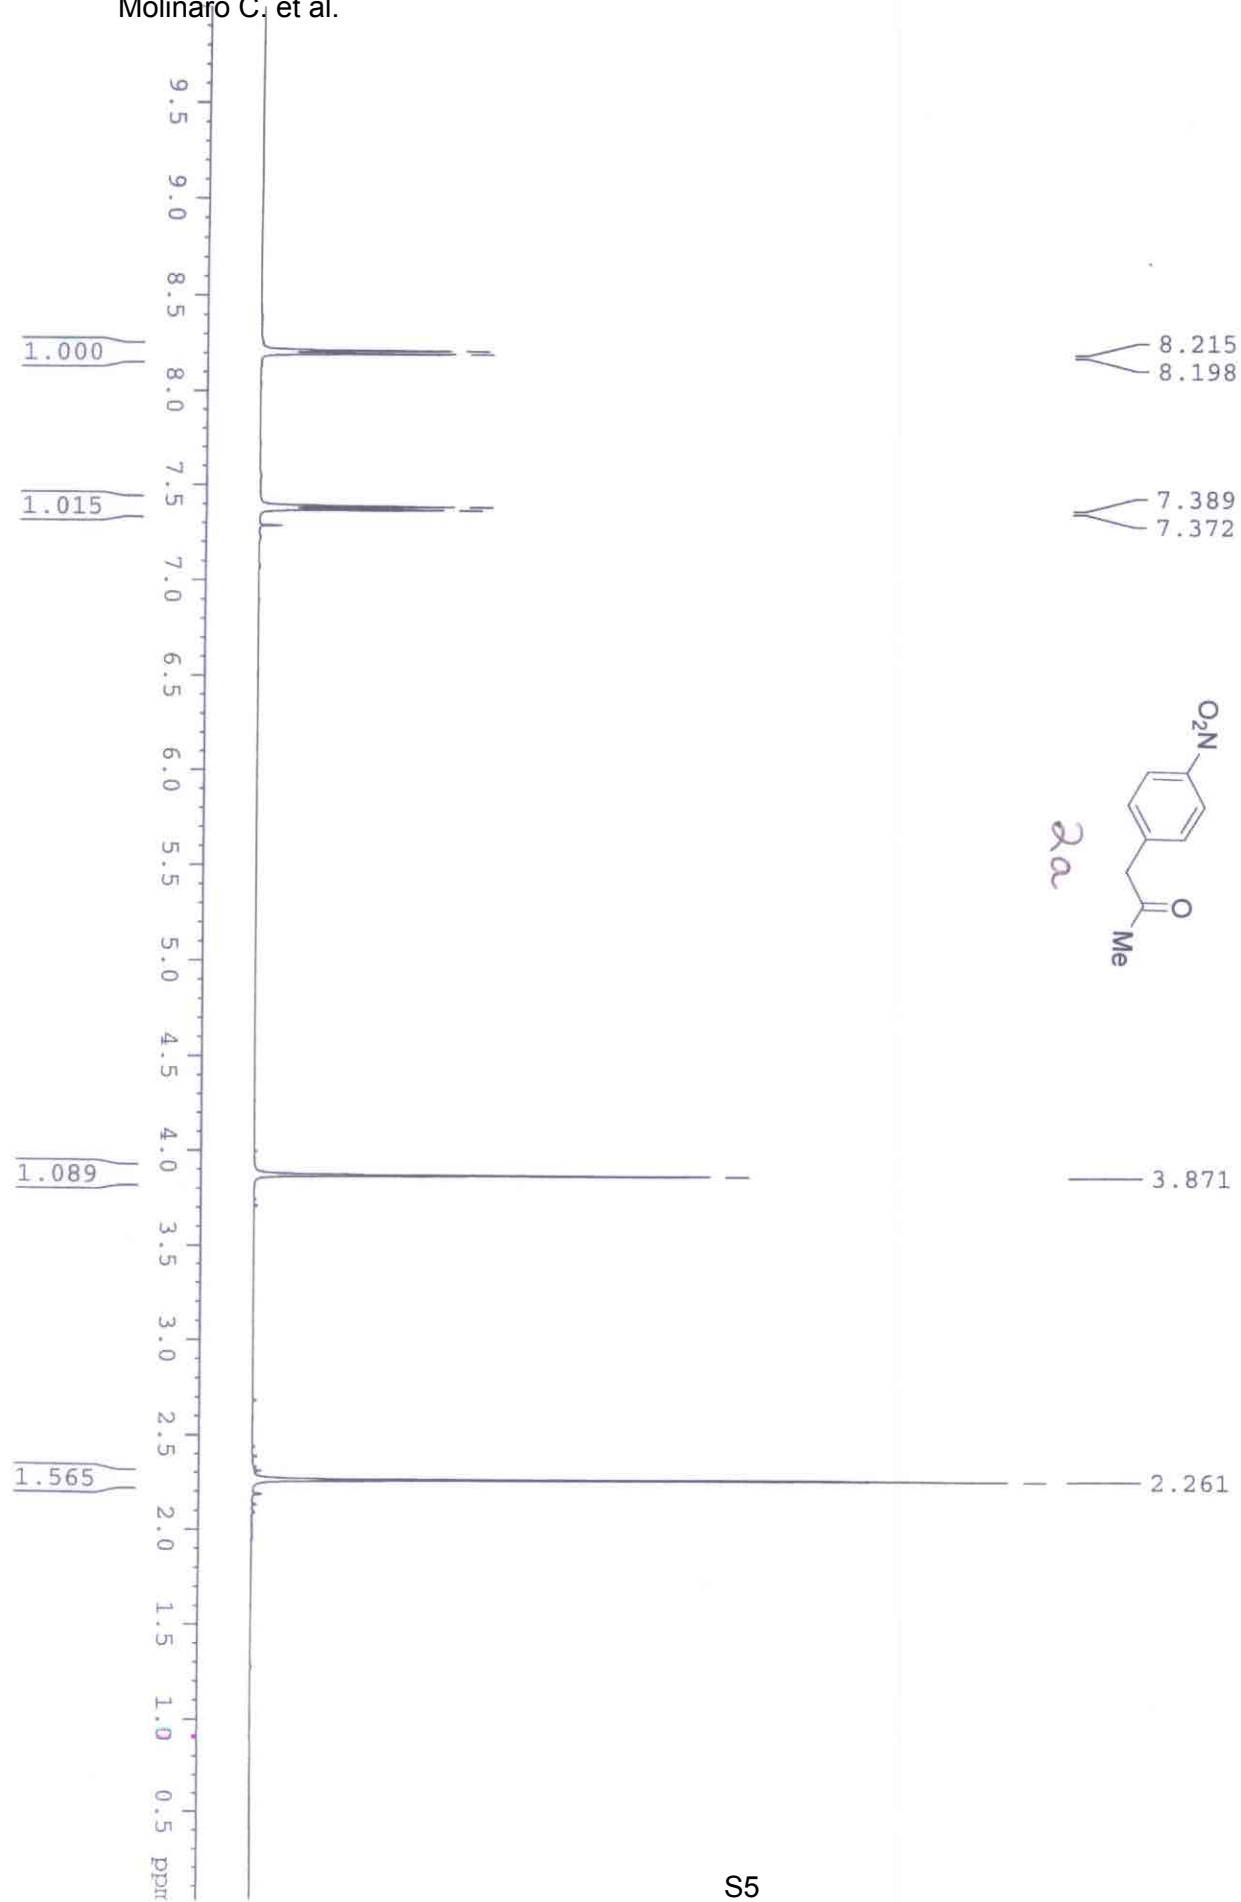

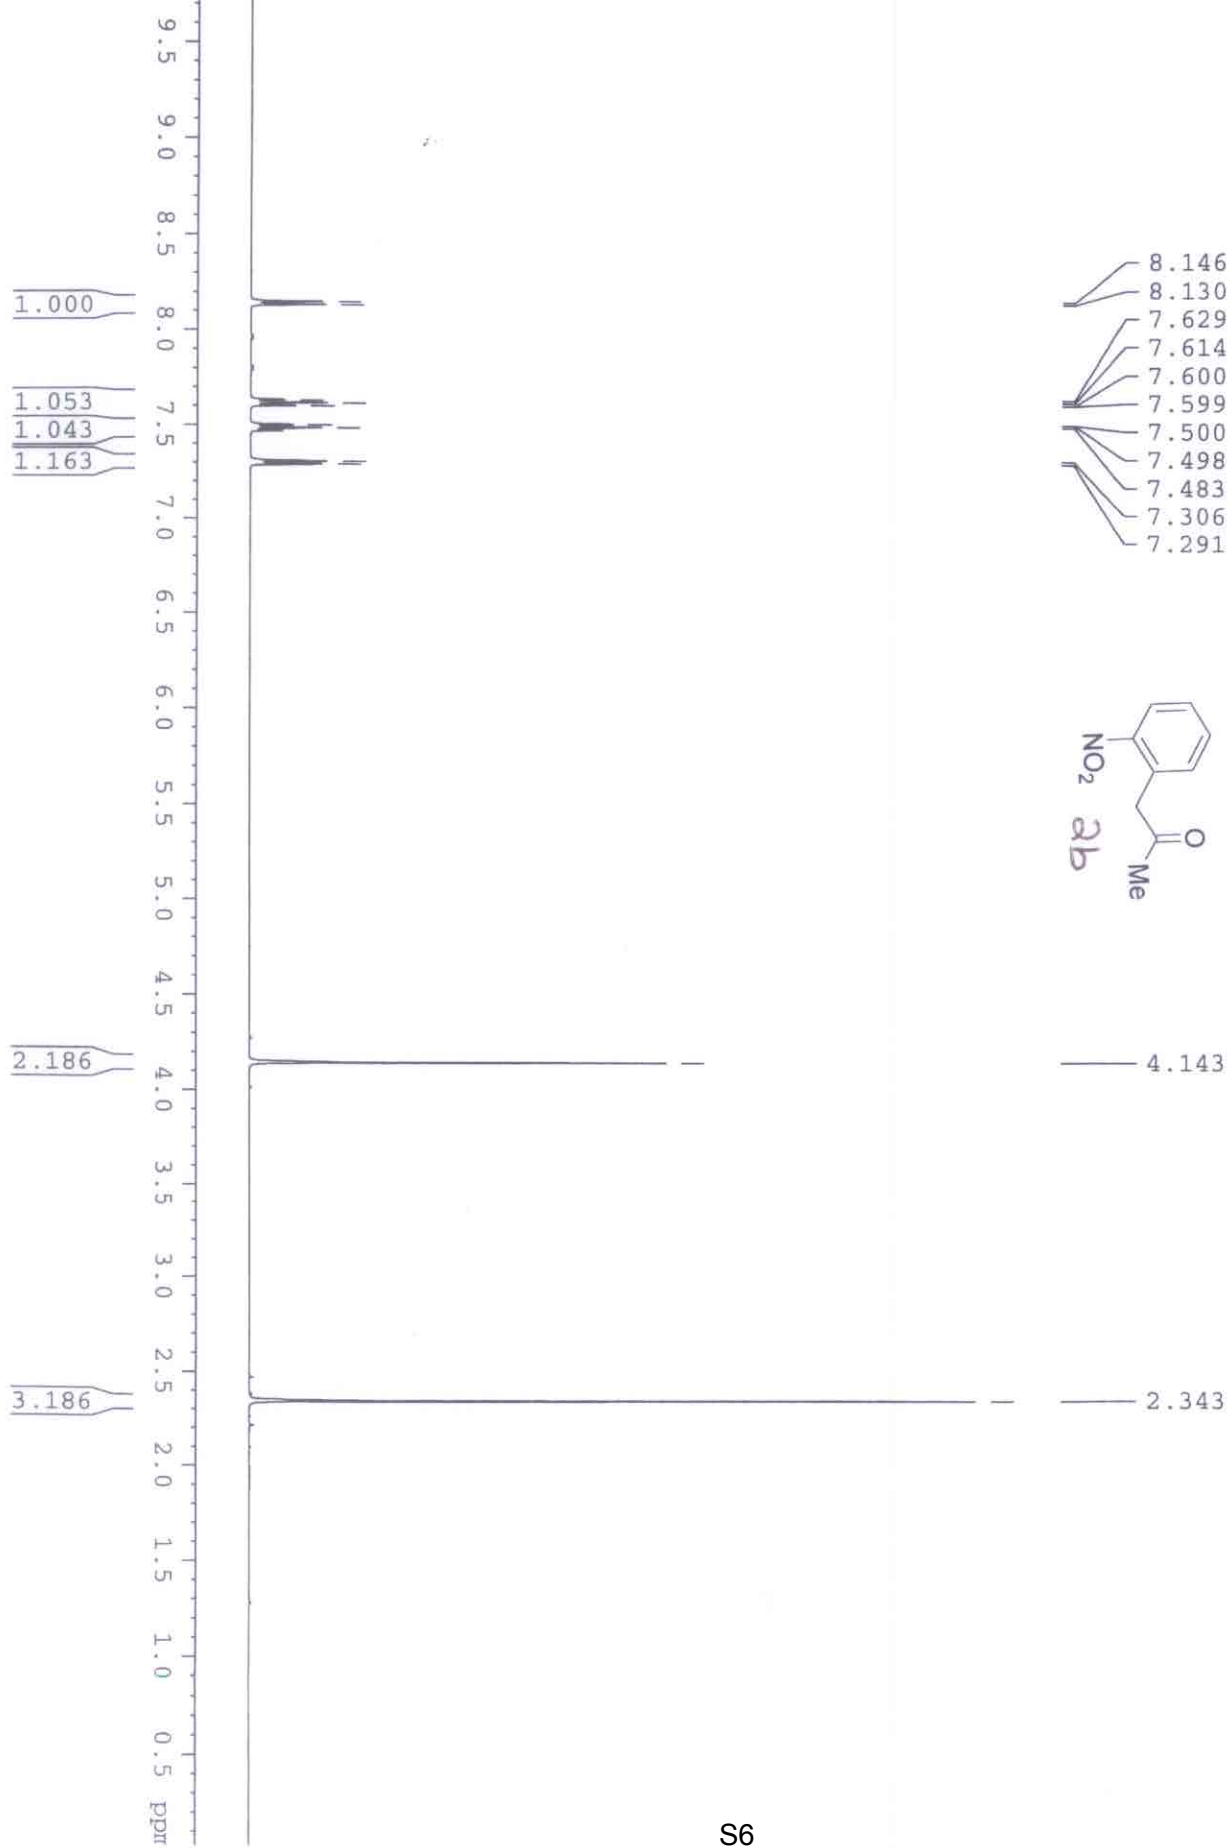

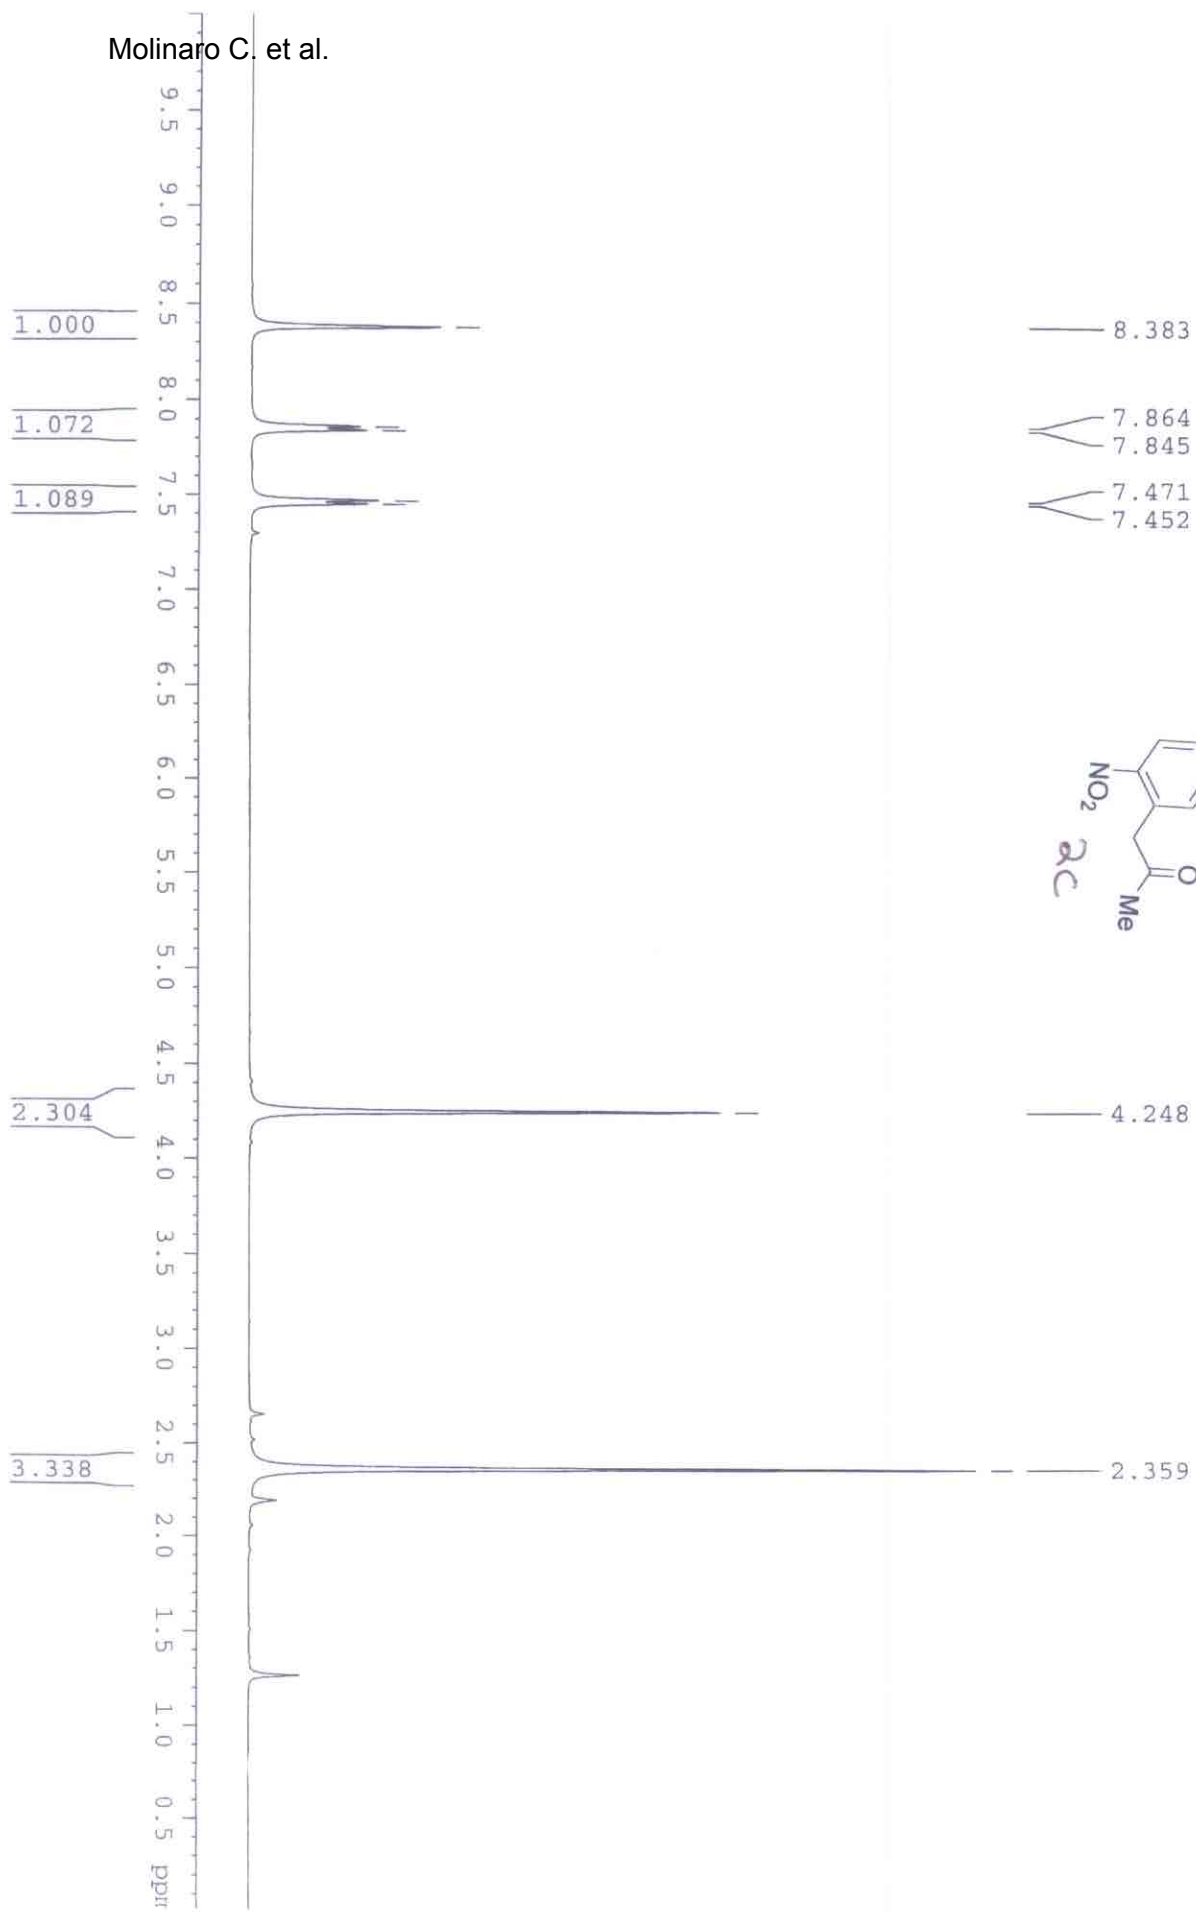

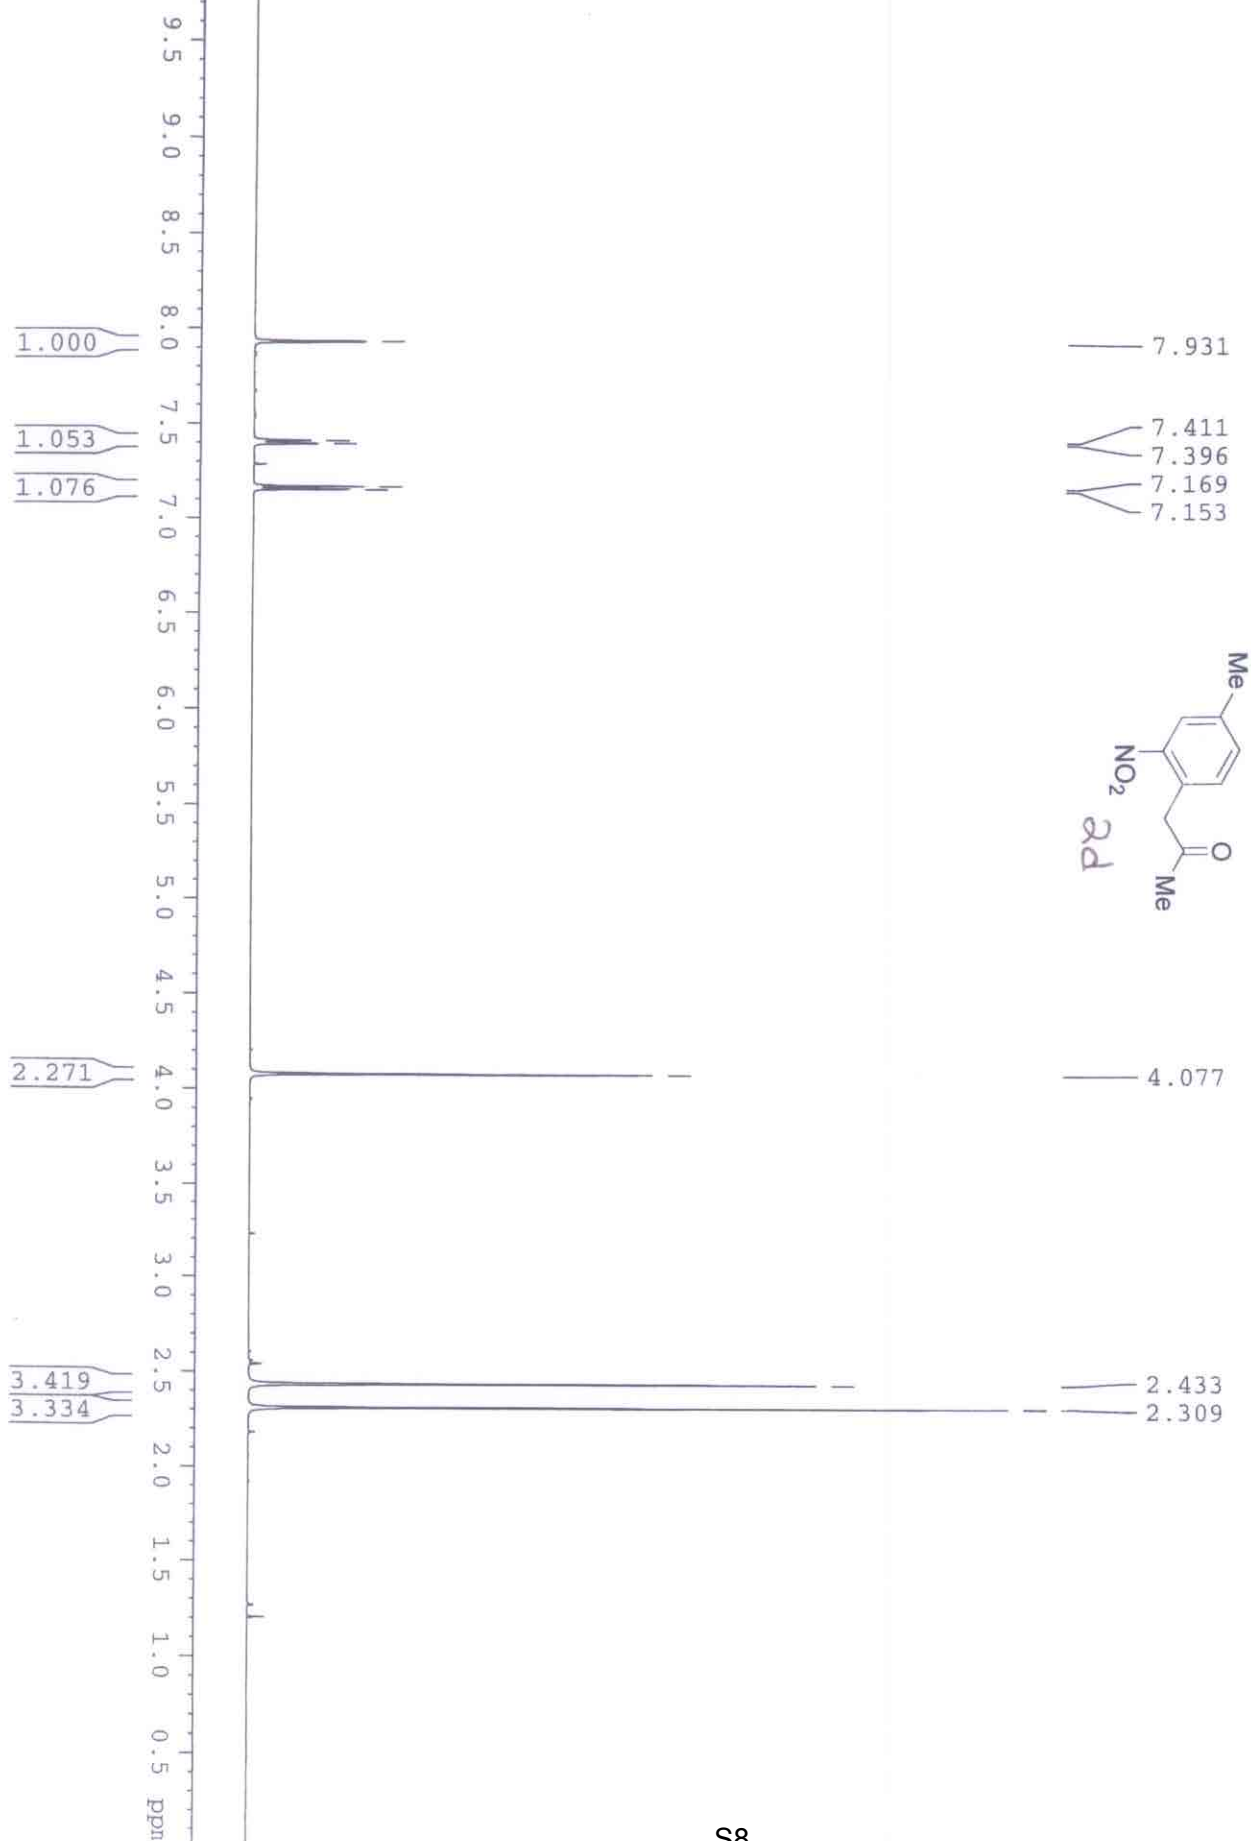



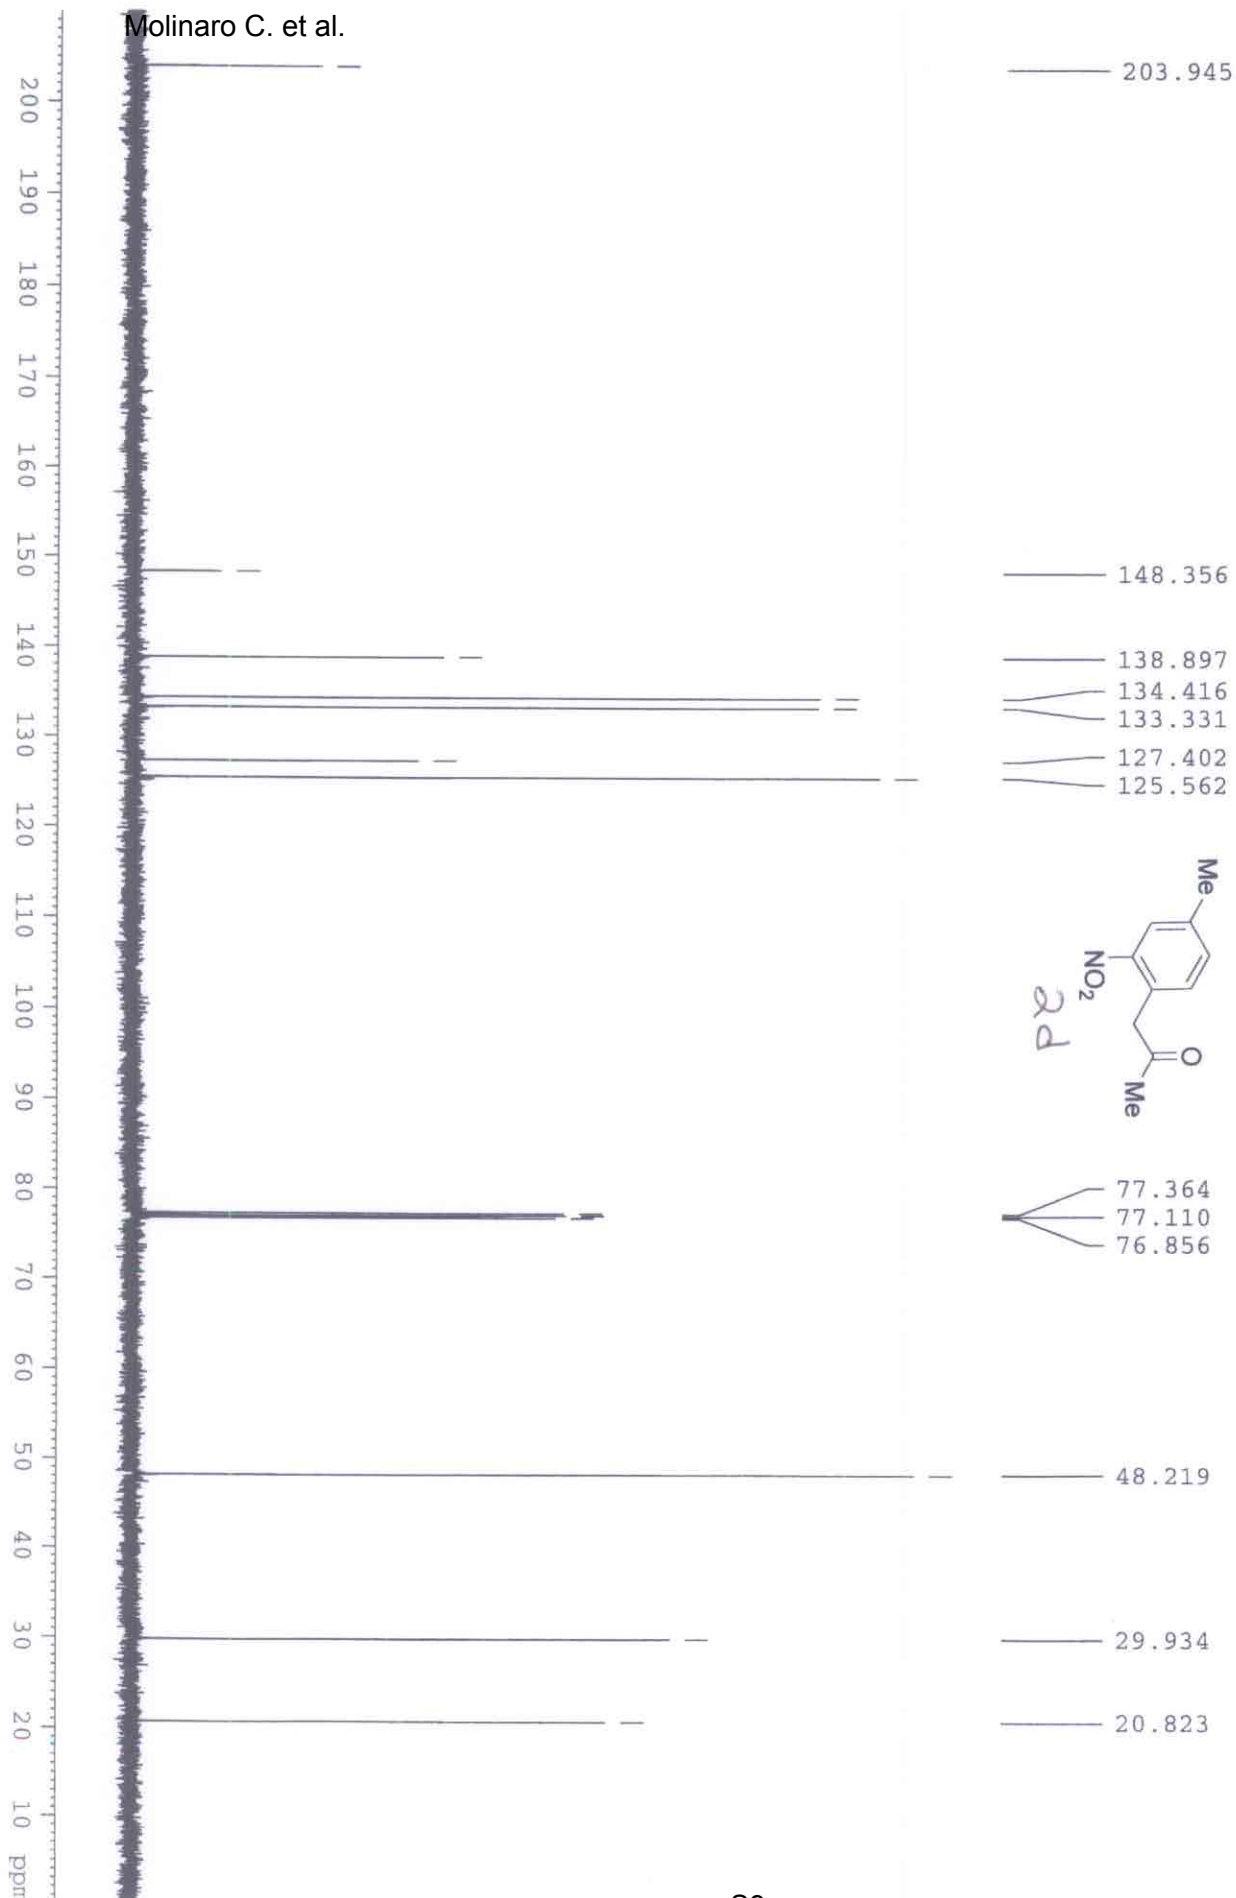

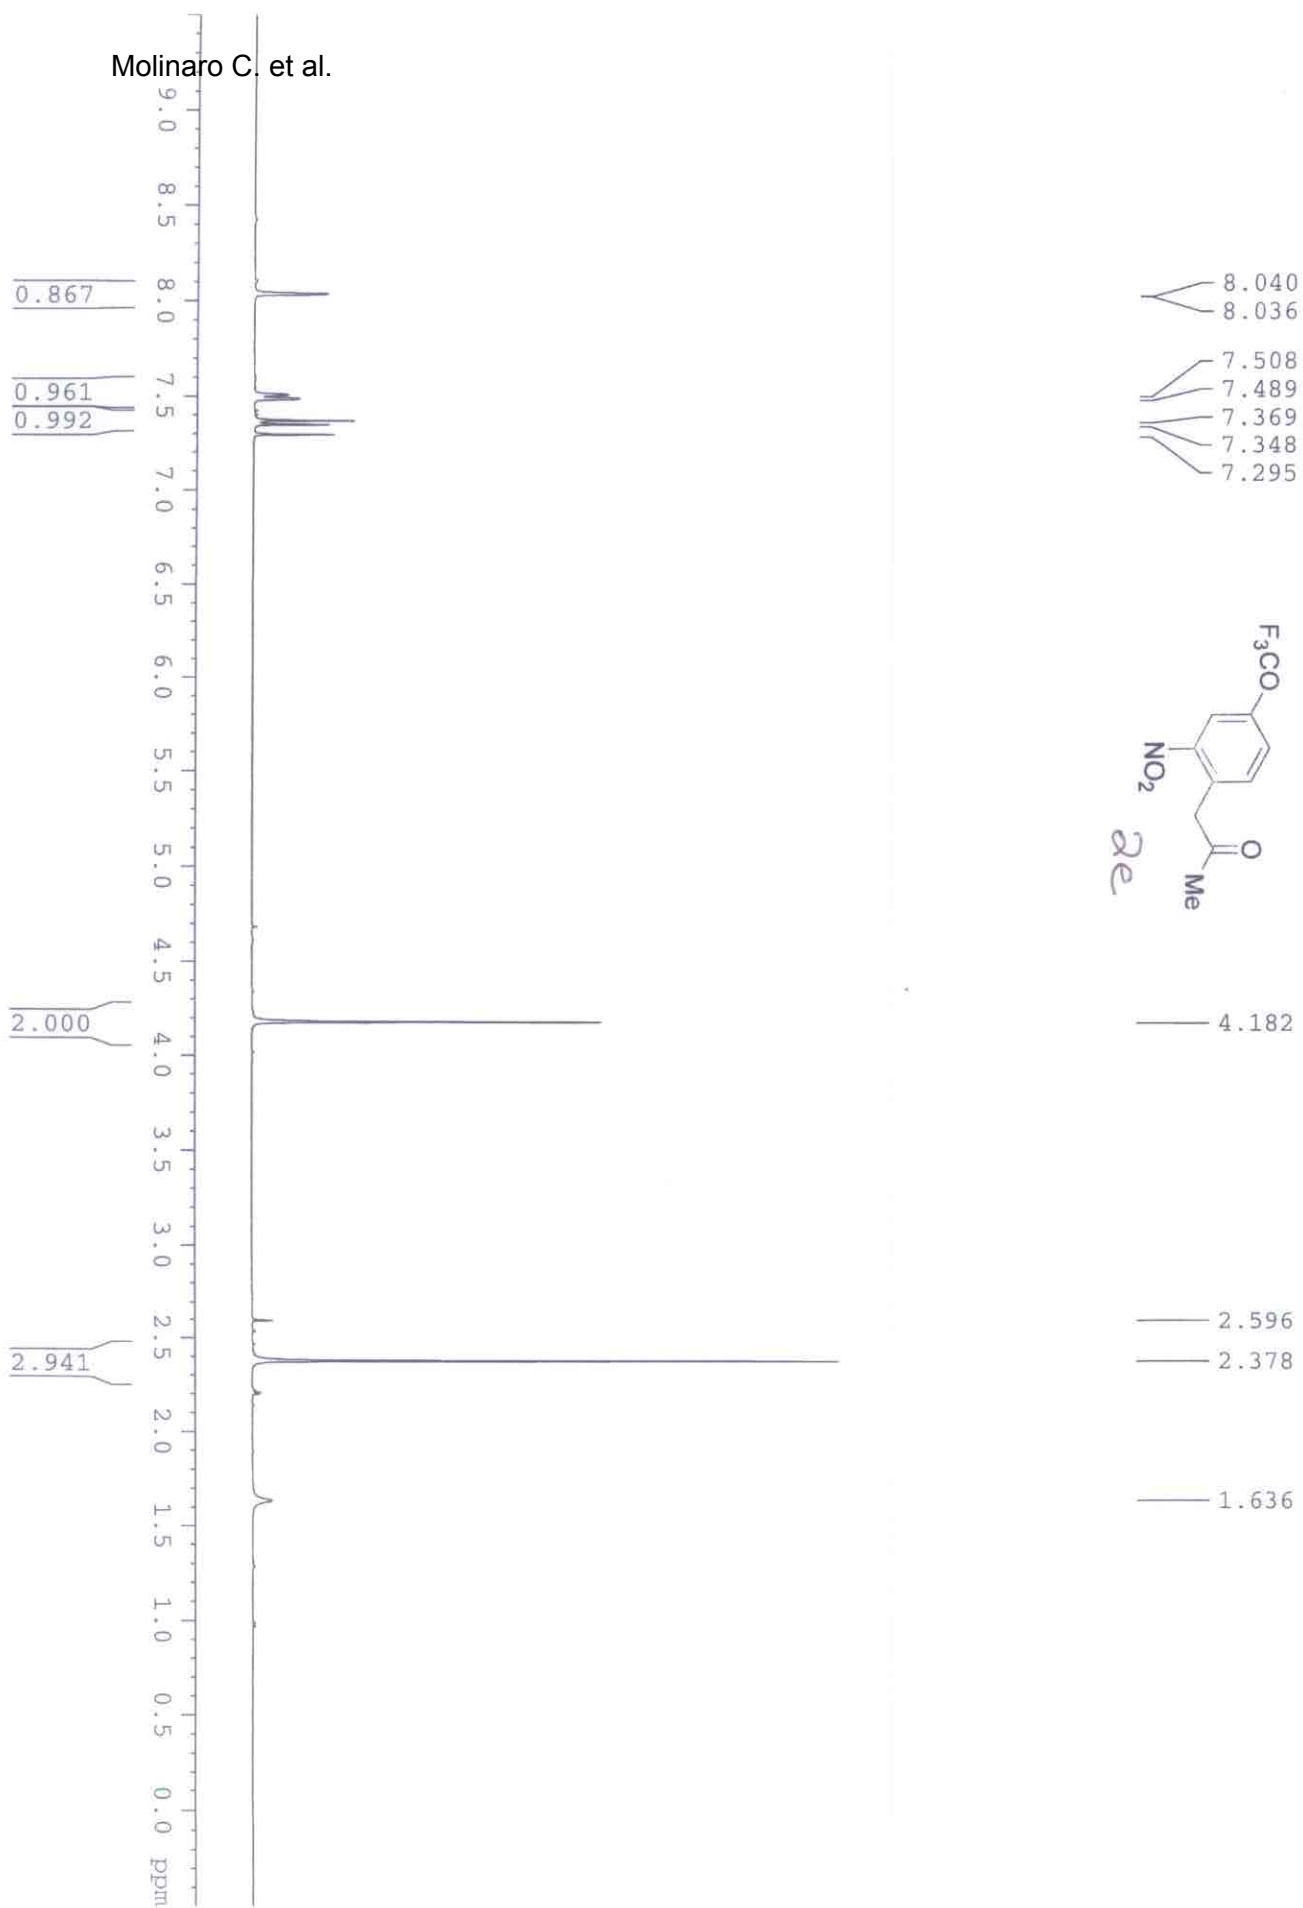

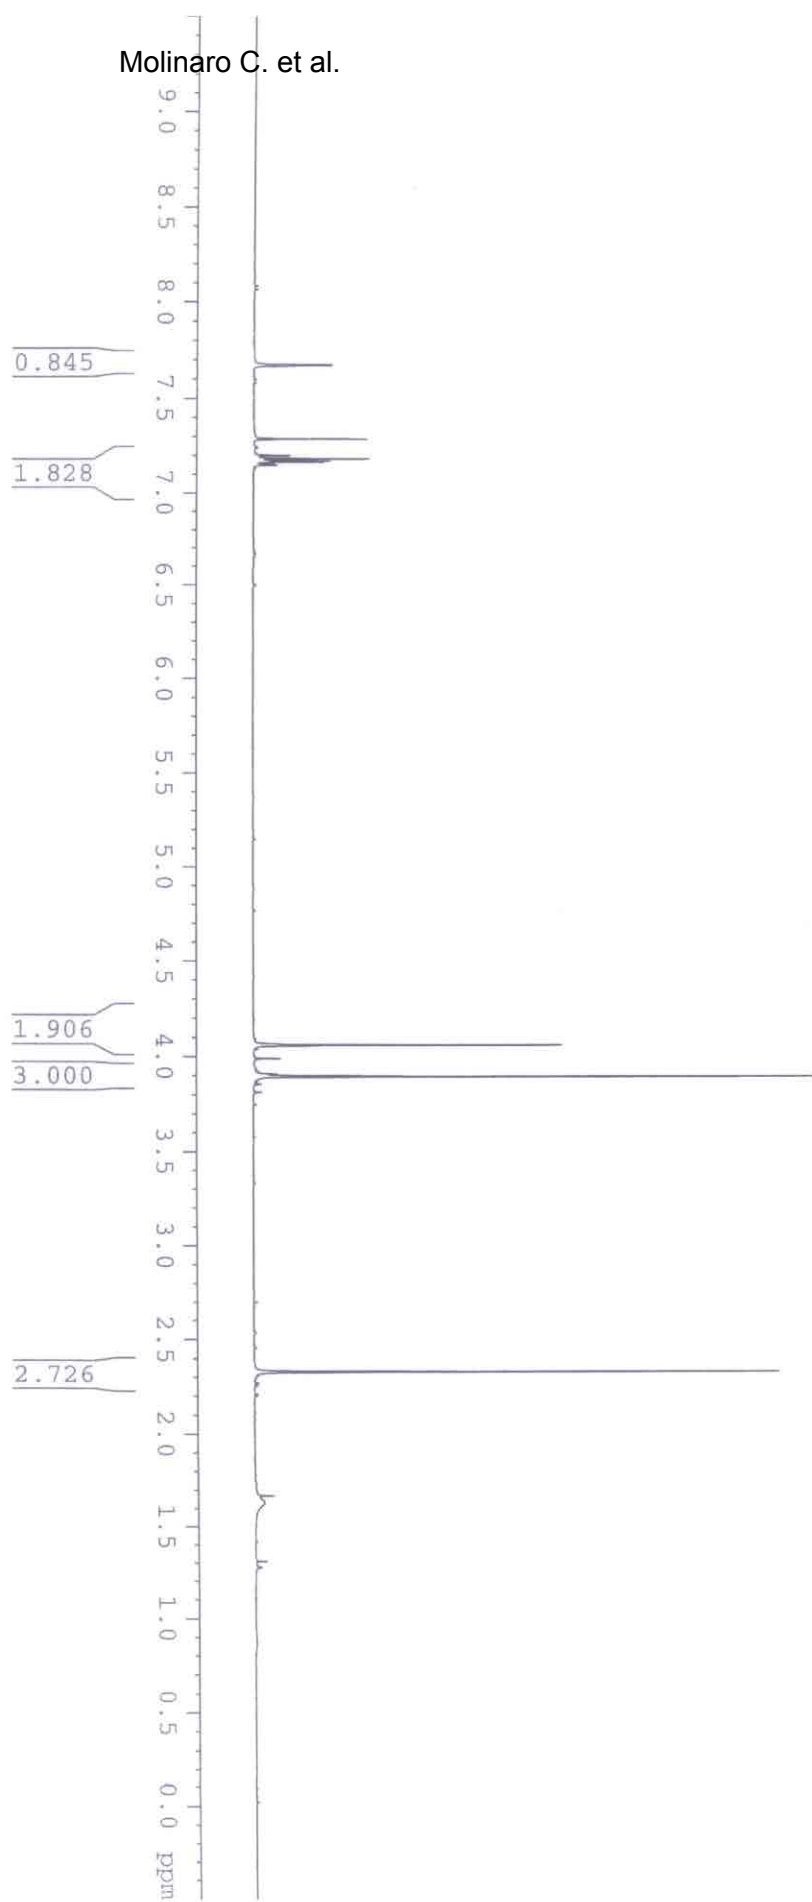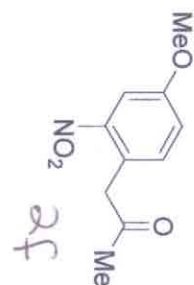

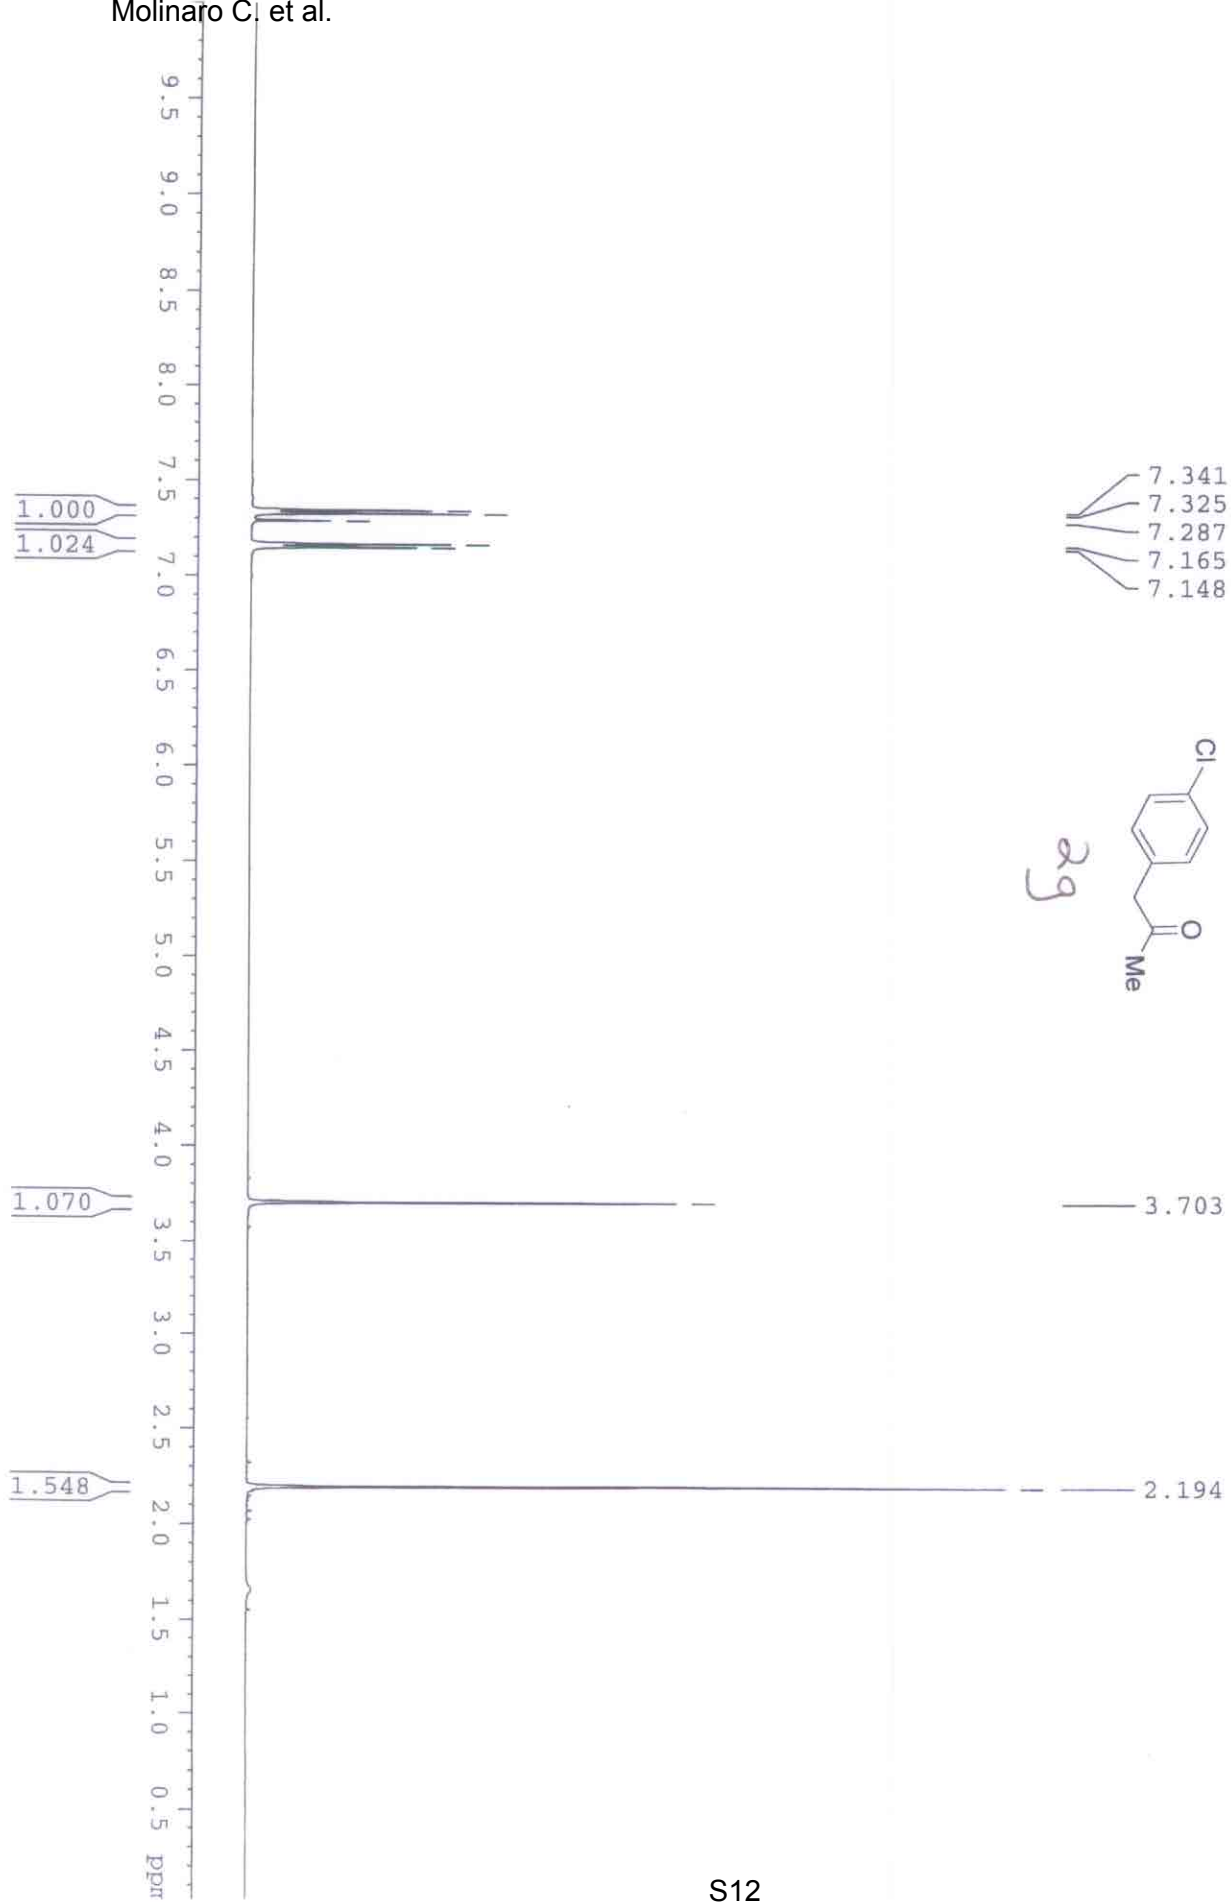

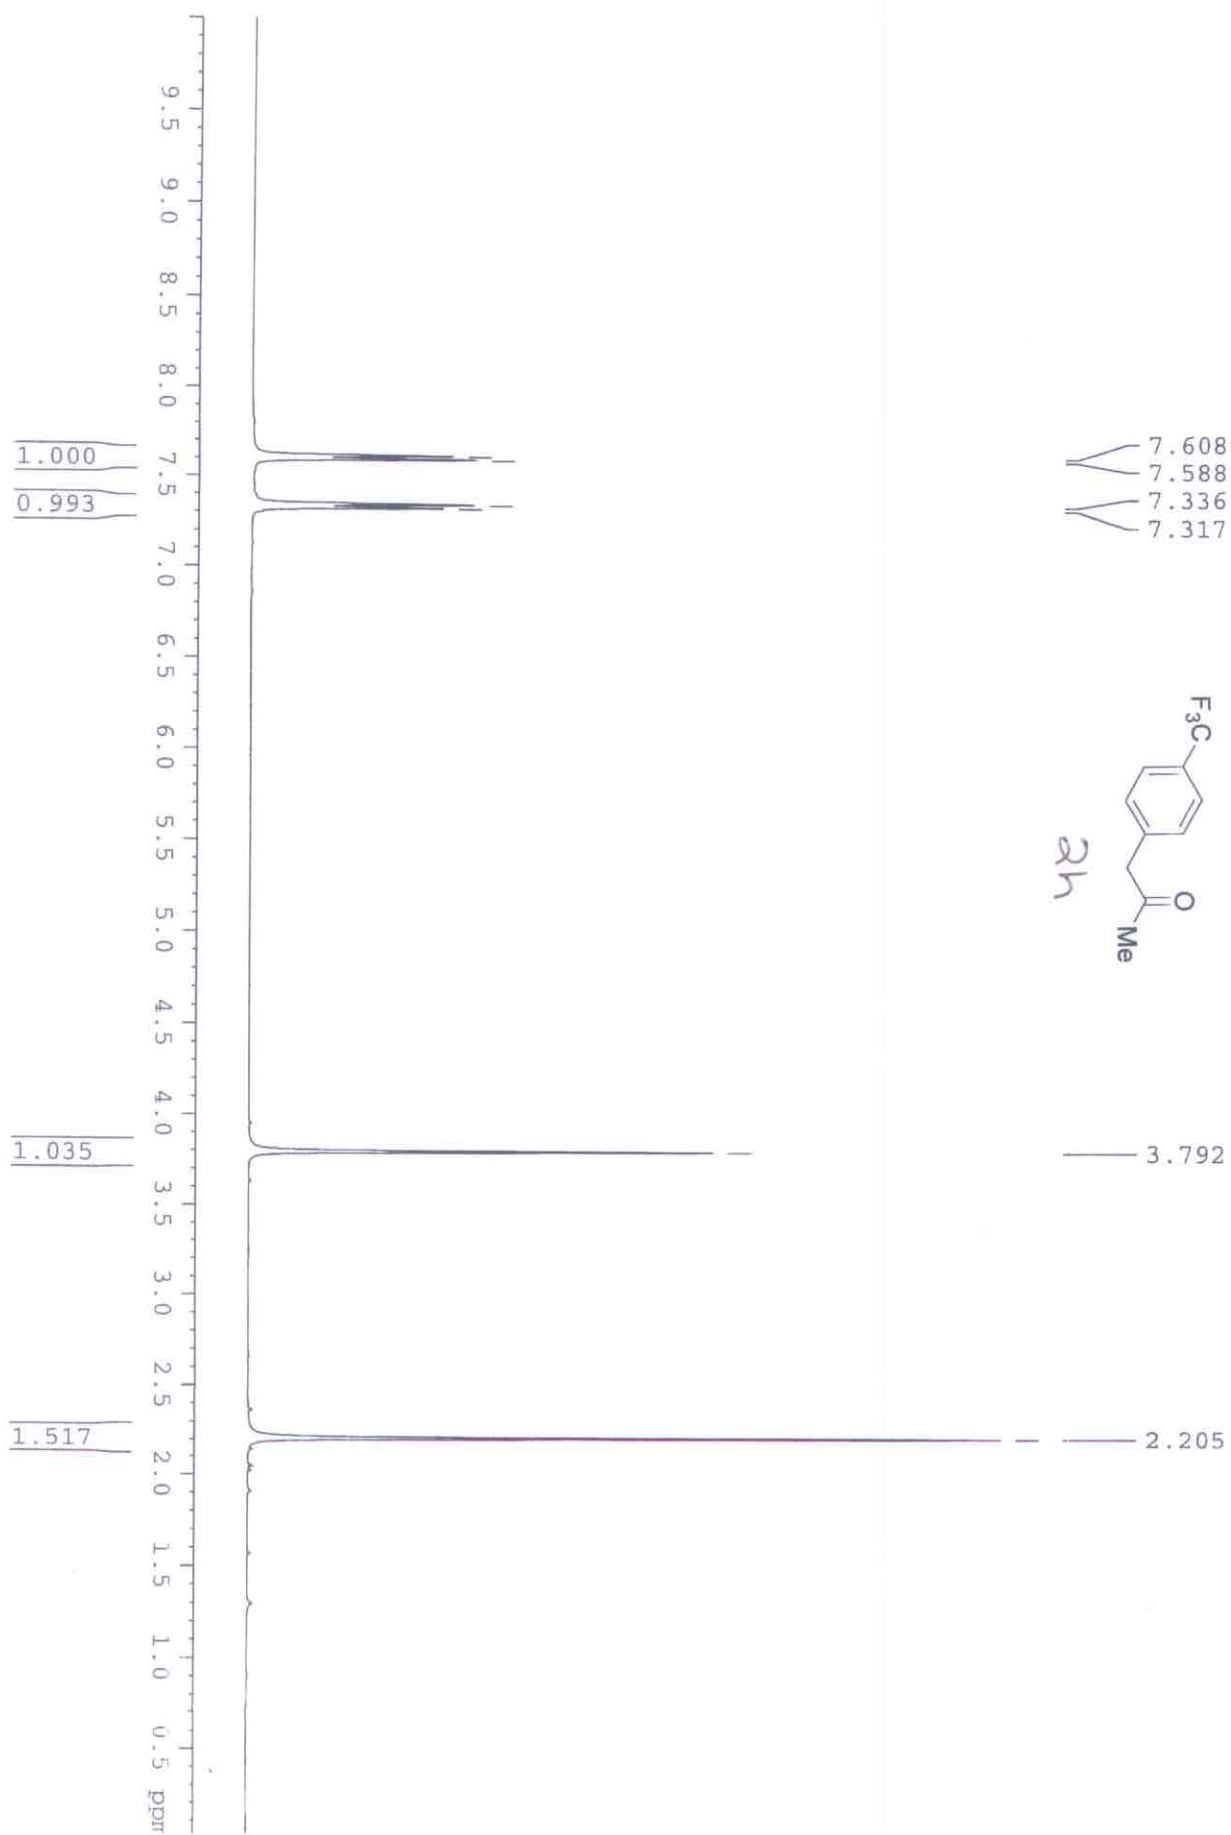

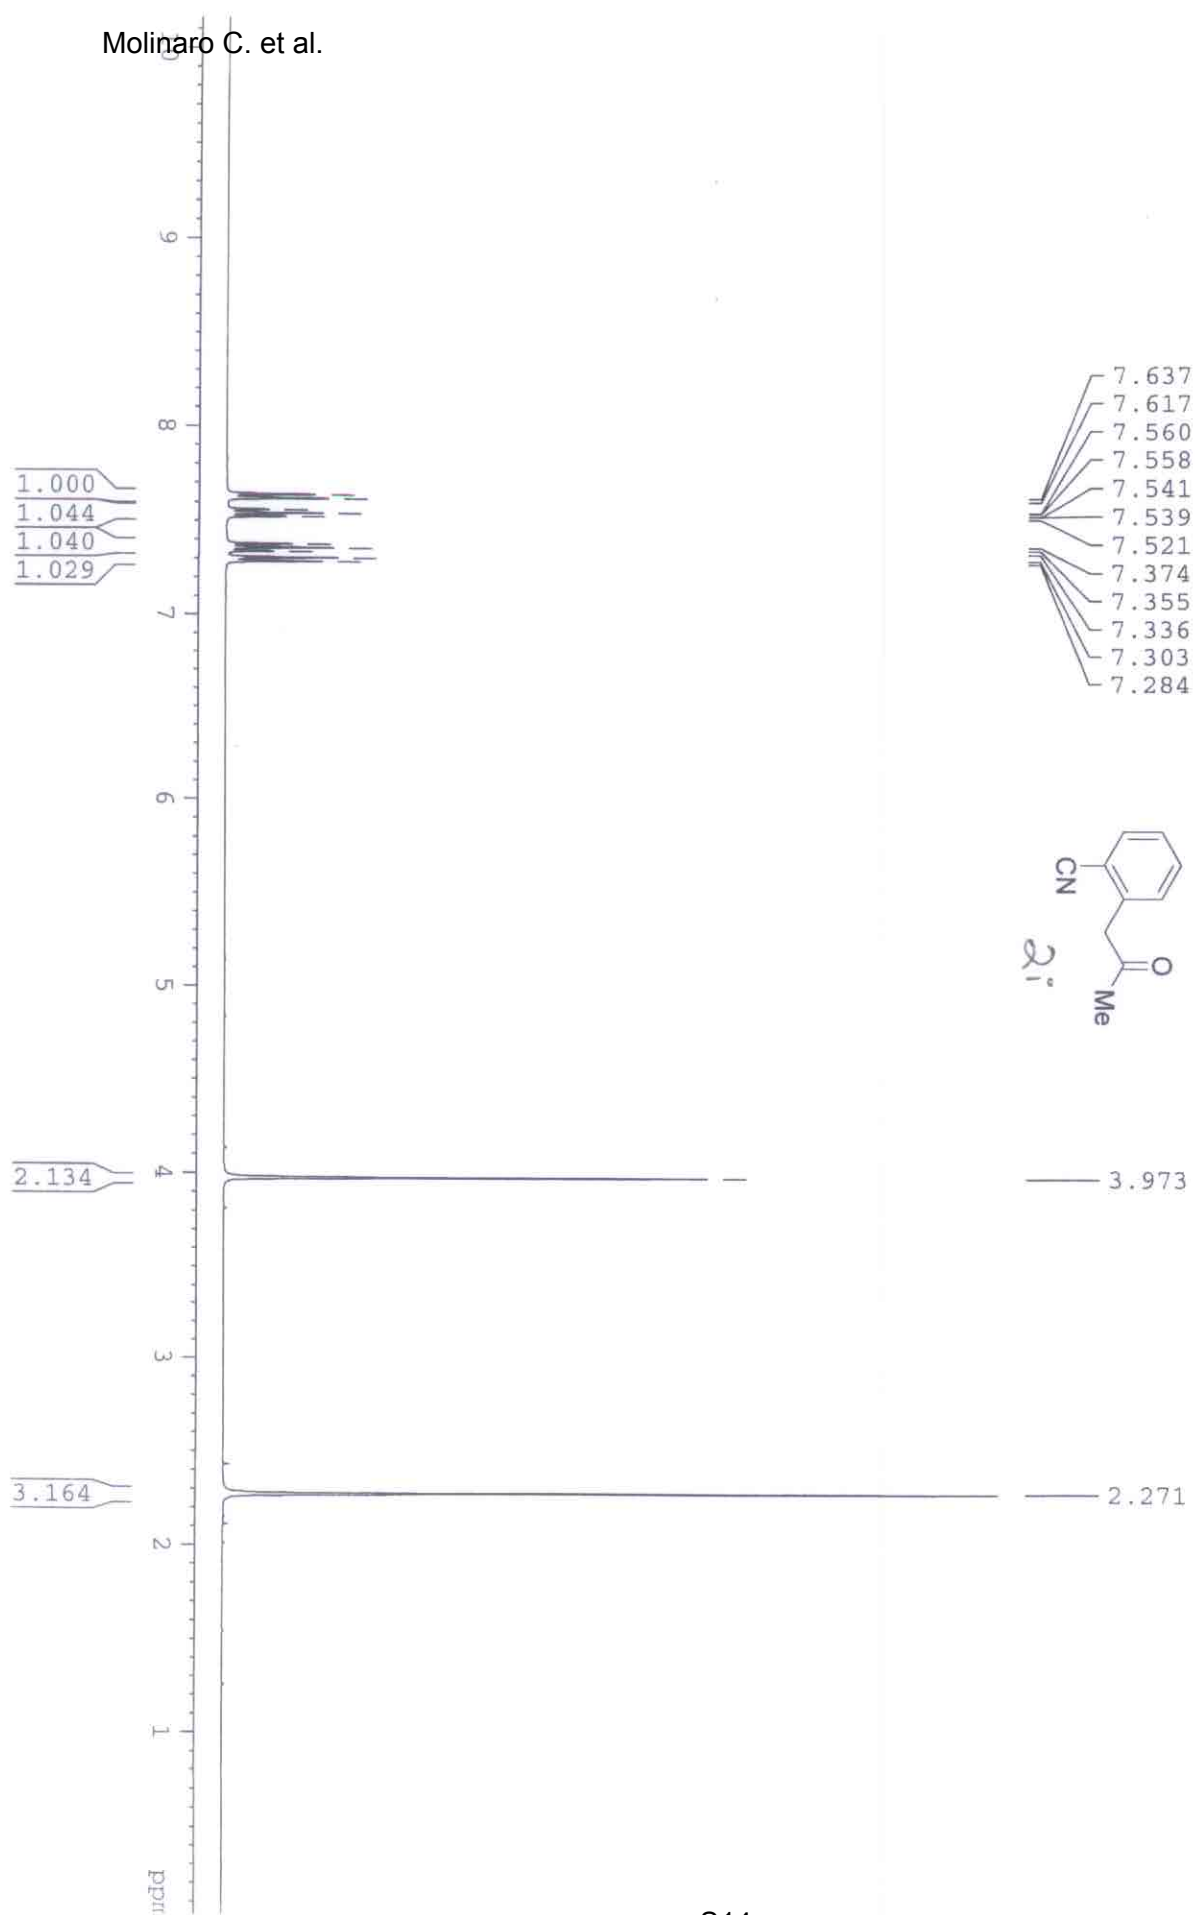

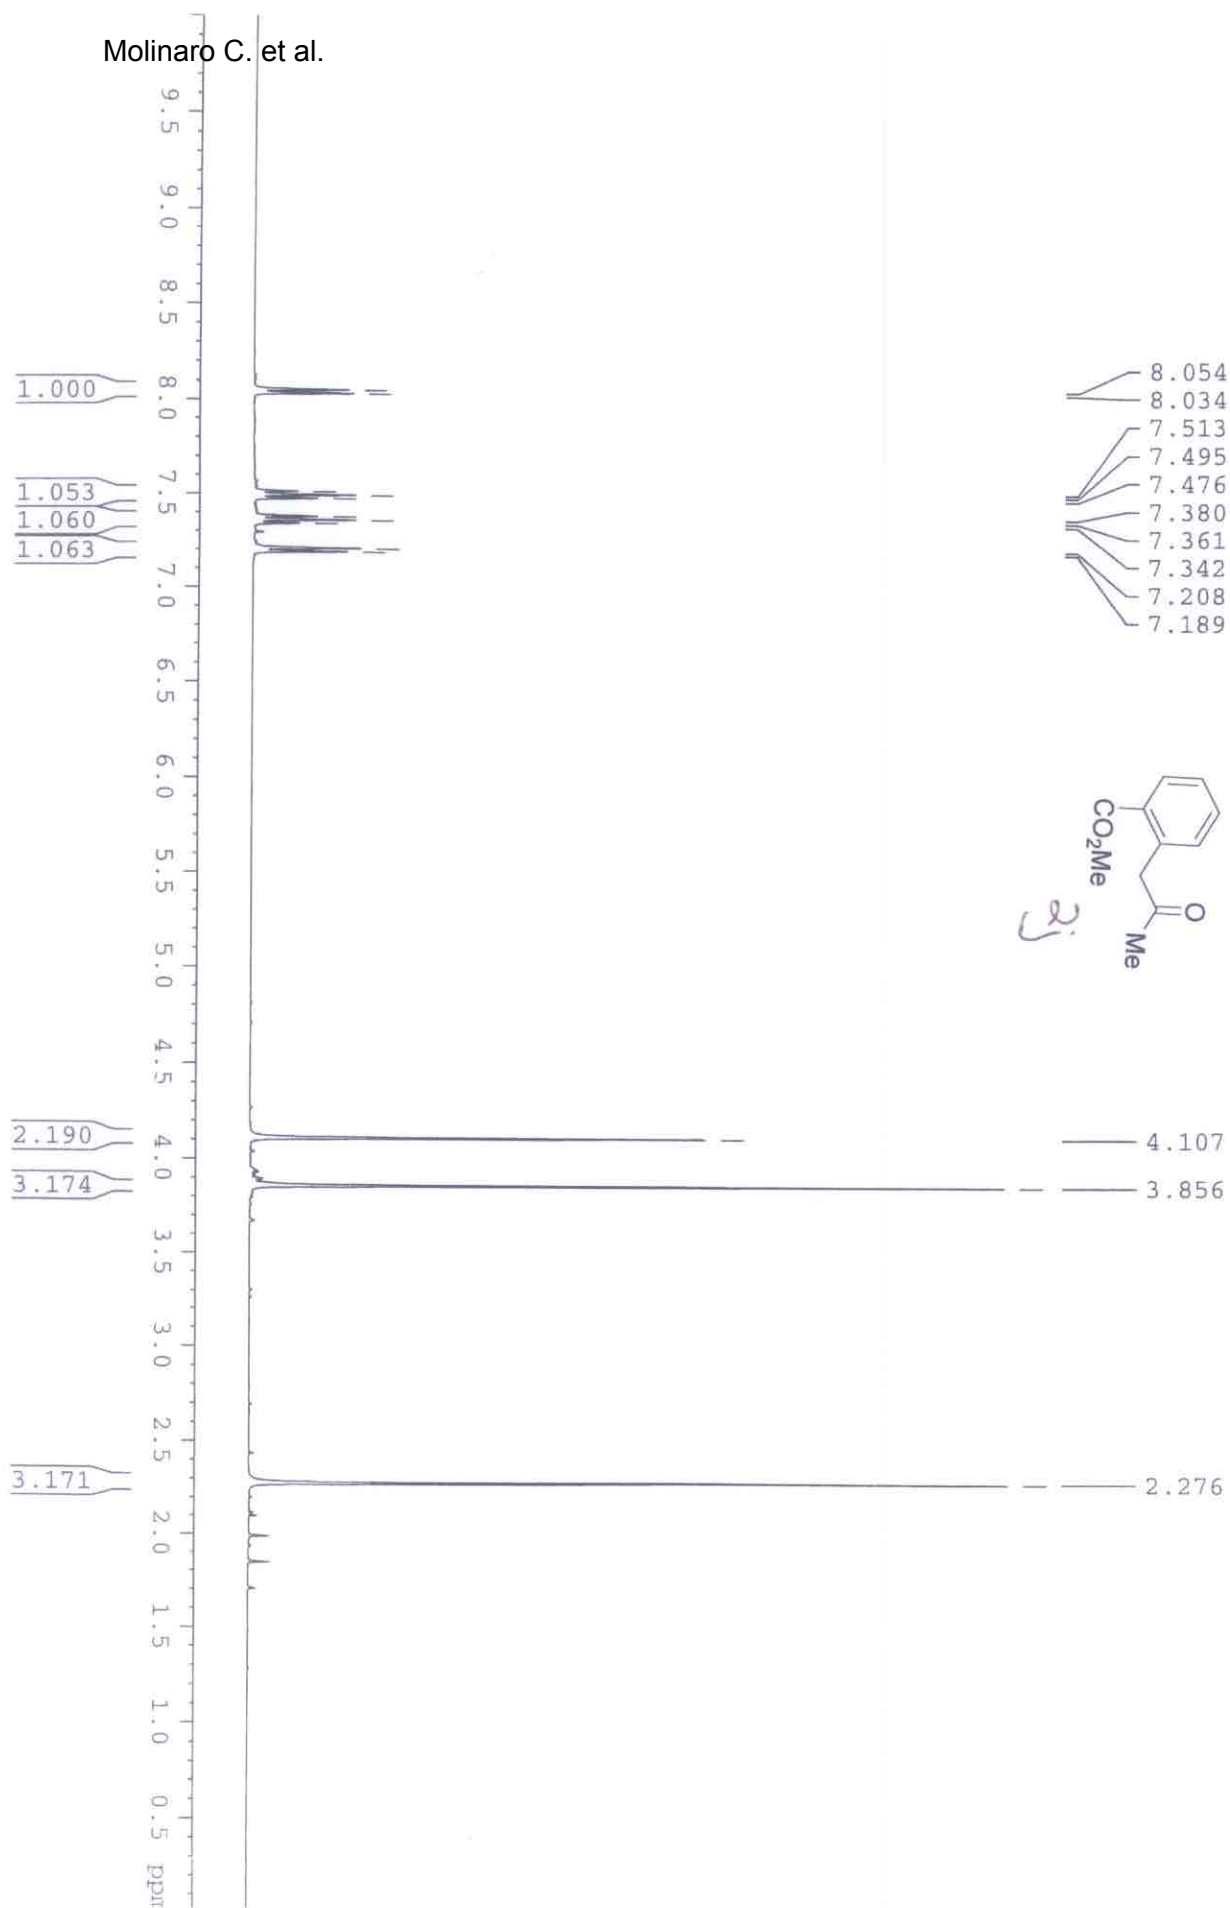

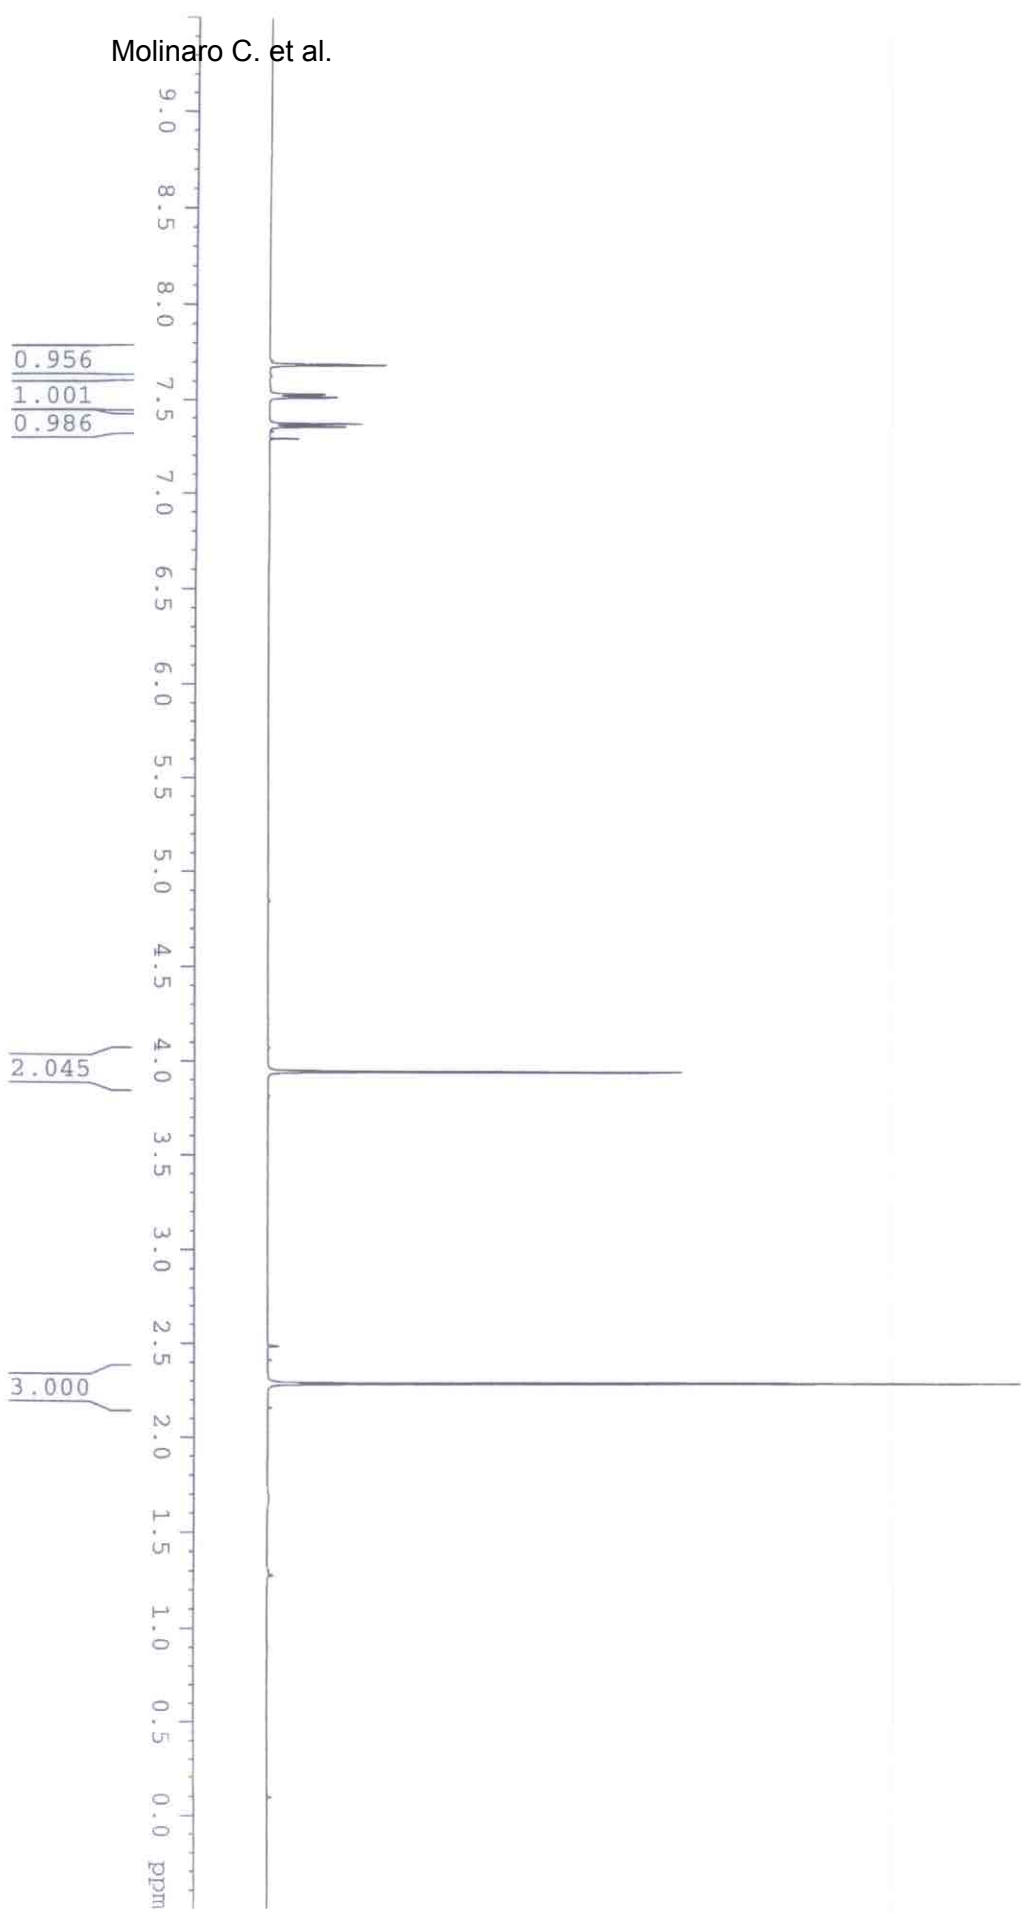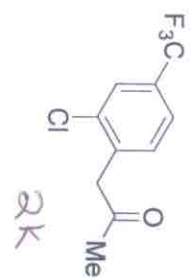



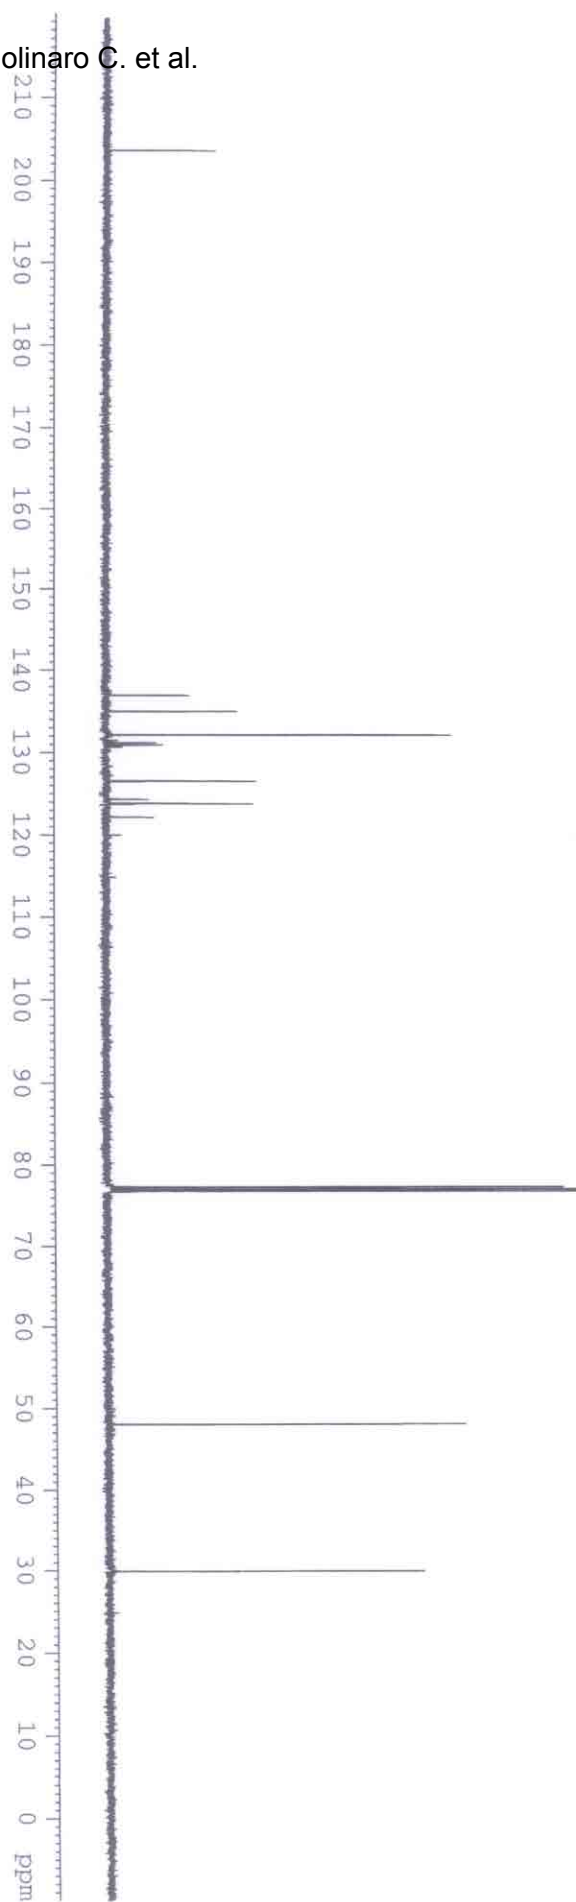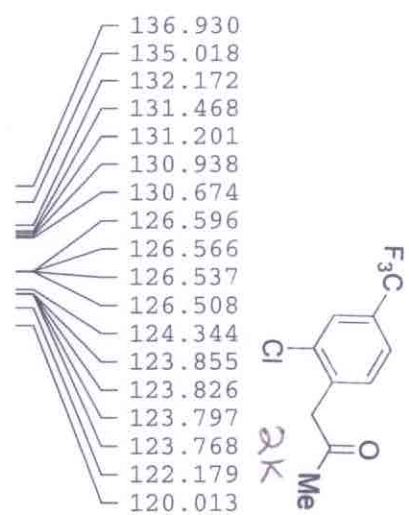

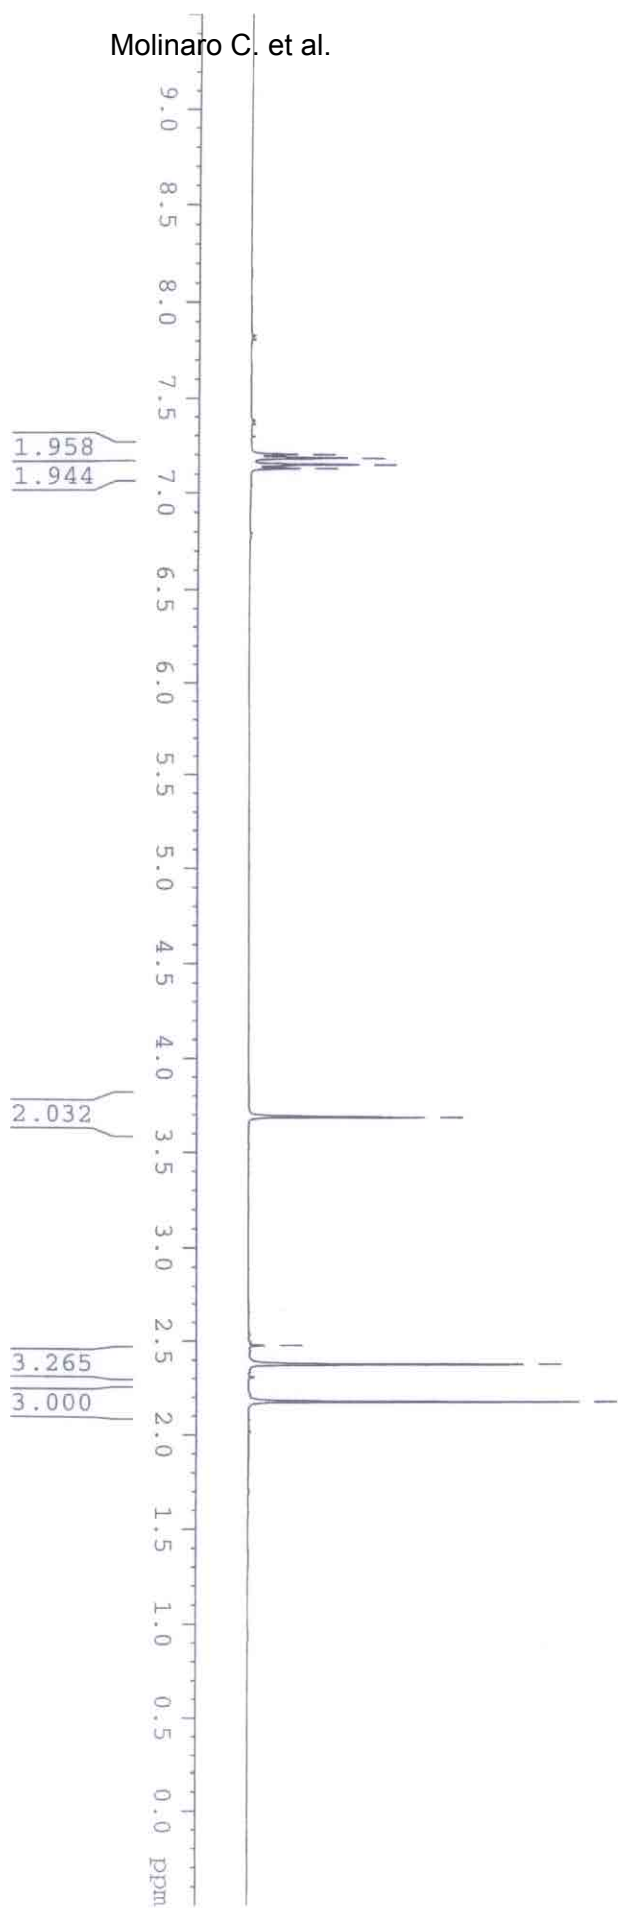

7.199  
7.179  
7.147  
7.127

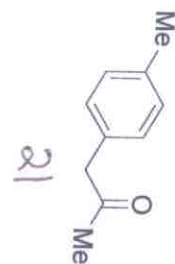

3.692

2.481  
2.380  
2.179

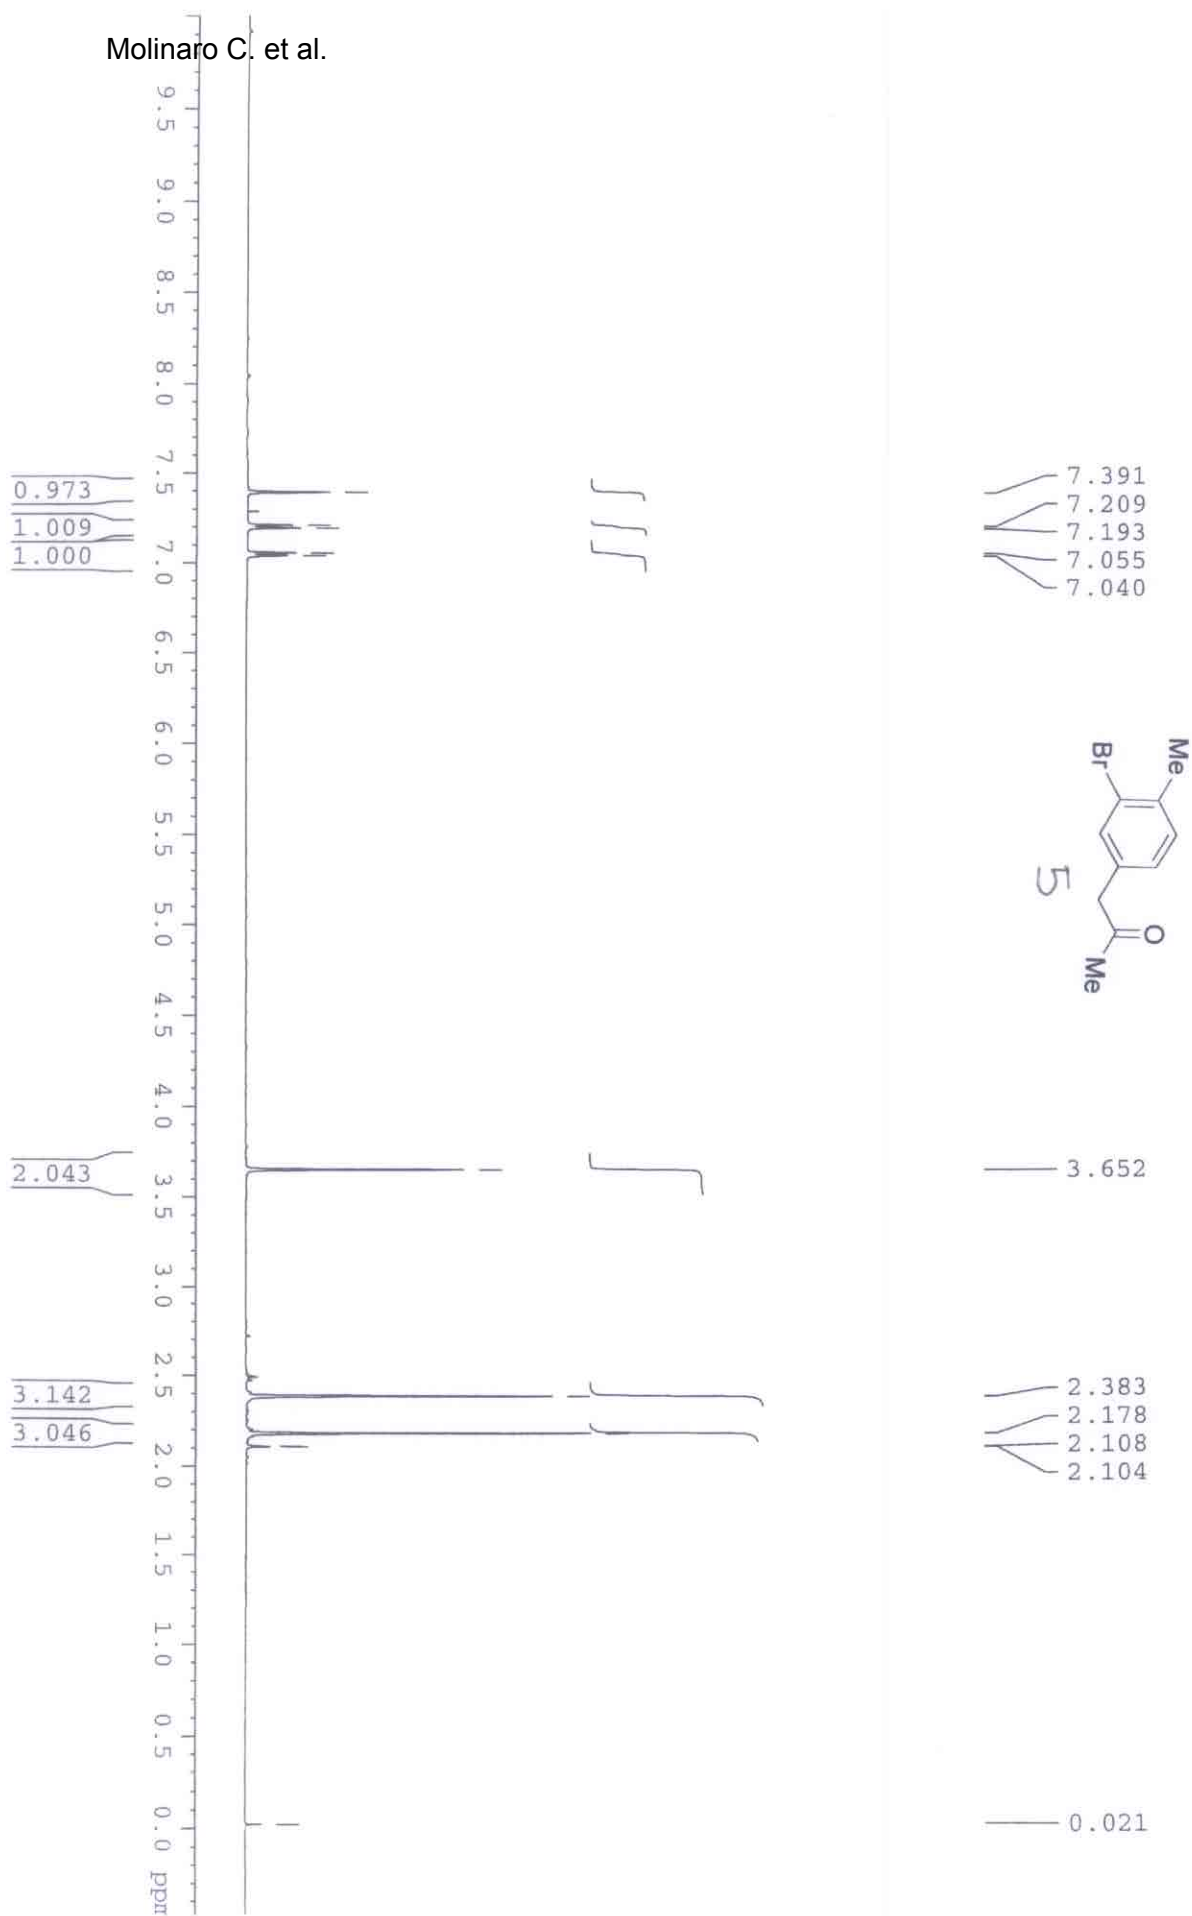

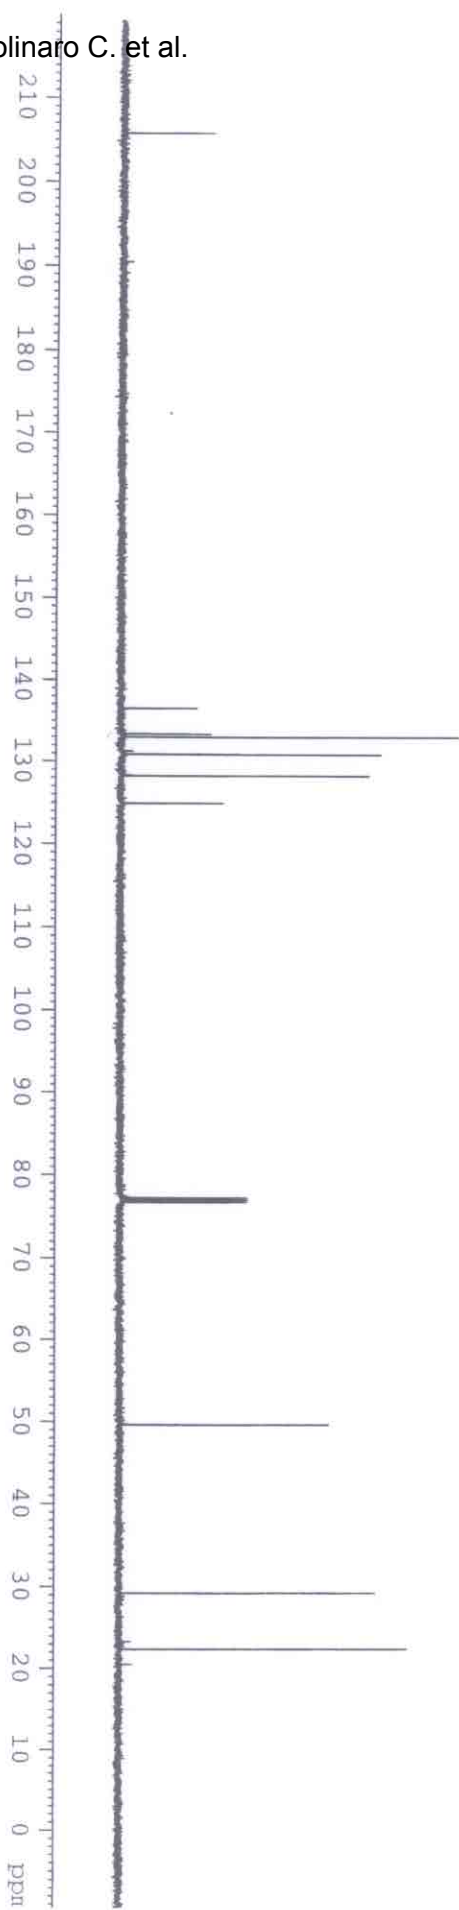

205.713

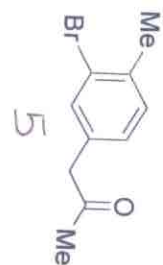

136.472  
133.335  
132.975  
130.857  
128.235  
124.914

77.249  
76.995  
76.740

49.659

29.260

22.380
